# Supplementary material for: Soluble urokinase plasminogen activator receptor (suPAR) as a prognostic marker of mortality in healthy, general and patient populations: protocol for a systematic review and meta-analysis
Source: PubMed Central journal article supplement — BMJ Open. 2020 Jul 19;10(7):e036125. doi: 10.1136/bmjopen-2019-036125 (PMC7371134; doi:10.1136/bmjopen-2019-036125), 2020-07-19
Supplement: bmjopen-2019-036125.draft_revisions.pdf [file bmjopen-2019-036125.draft_revisions.pdf]

# BMJ Open

BMJ Open is committed to open peer review. As part of this commitment we make the peer review history of every article we publish publicly available.

When an article is published we post the peer reviewers' comments and the authors' responses online. We also post the versions of the paper that were used during peer review. These are the versions that the peer review comments apply to.

The versions of the paper that follow are the versions that were submitted during the peer review process. They are not the versions of record or the final published versions. They should not be cited or distributed as the published version of this manuscript.

BMJ Open is an open access journal and the full, final, typeset and author-corrected version of record of the manuscript is available on our site with no access controls, subscription charges or pay-per-view fees (<http://bmjopen.bmj.com>).

If you have any questions on BMJ Open's open peer review process please email [info.bmjopen@bmj.com](mailto:info.bmjopen@bmj.com)

# BMJ Open

## suPAR as a prognostic marker of mortality in healthy, general, and patient populations: protocol for a systematic review and meta-analysis

|                               |                                                                                                                                                                                                                                                                                                                                                                                                                                                                                                                                                                                                                                         |
|-------------------------------|-----------------------------------------------------------------------------------------------------------------------------------------------------------------------------------------------------------------------------------------------------------------------------------------------------------------------------------------------------------------------------------------------------------------------------------------------------------------------------------------------------------------------------------------------------------------------------------------------------------------------------------------|
| Journal:                      | <i>BMJ Open</i>                                                                                                                                                                                                                                                                                                                                                                                                                                                                                                                                                                                                                         |
| Manuscript ID                 | bmjopen-2019-036125                                                                                                                                                                                                                                                                                                                                                                                                                                                                                                                                                                                                                     |
| Article Type:                 | Protocol                                                                                                                                                                                                                                                                                                                                                                                                                                                                                                                                                                                                                                |
| Date Submitted by the Author: | 01-Dec-2019                                                                                                                                                                                                                                                                                                                                                                                                                                                                                                                                                                                                                             |
| Complete List of Authors:     | Petersen, Jens Emil; Duke University, Department of Infectious Diseases<br>Kallemose, Thomas; Copenhagen University Hospital Hvidovre, Clinical Research Centre 056<br>Barton, Karen; Duke University, Duke University Medical Center Library & Archives<br>Caspi, A; Duke University, Department of Psychology and Neuroscience; King's College London, Social, Genetic, and Developmental Psychiatry Centre, Institute of Psychiatry, Psychology, and Neuroscience<br>Rasmussen, Line Jee Hartmann; Duke University, Department of Psychology and Neuroscience; Copenhagen University Hospital Hvidovre, Clinical Research Centre 056 |
| Keywords:                     | Clinical chemistry < PATHOLOGY, PREVENTIVE MEDICINE, PUBLIC HEALTH, STATISTICS & RESEARCH METHODS, EPIDEMIOLOGY, IMMUNOLOGY                                                                                                                                                                                                                                                                                                                                                                                                                                                                                                             |
|                               |                                                                                                                                                                                                                                                                                                                                                                                                                                                                                                                                                                                                                                         |

SCHOLARONE™  
Manuscripts

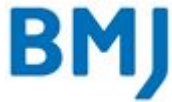

I, the Submitting Author has the right to grant and does grant on behalf of all authors of the Work (as defined in the below author licence), an exclusive licence and/or a non-exclusive licence for contributions from authors who are: i) UK Crown employees; ii) where BMJ has agreed a CC-BY licence shall apply, and/or iii) in accordance with the terms applicable for US Federal Government officers or employees acting as part of their official duties; on a worldwide, perpetual, irrevocable, royalty-free basis to BMJ Publishing Group Ltd ("BMJ") its licensees and where the relevant Journal is co-owned by BMJ to the co-owners of the Journal, to publish the Work in this journal and any other BMJ products and to exploit all rights, as set out in our [licence](#).

The Submitting Author accepts and understands that any supply made under these terms is made by BMJ to the Submitting Author unless you are acting as an employee on behalf of your employer or a postgraduate student of an affiliated institution which is paying any applicable article publishing charge ("APC") for Open Access articles. Where the Submitting Author wishes to make the Work available on an Open Access basis (and intends to pay the relevant APC), the terms of reuse of such Open Access shall be governed by a Creative Commons licence – details of these licences and which [Creative Commons](#) licence will apply to this Work are set out in our licence referred to above.

Other than as permitted in any relevant BMJ Author's Self Archiving Policies, I confirm this Work has not been accepted for publication elsewhere, is not being considered for publication elsewhere and does not duplicate material already published. I confirm all authors consent to publication of this Work and authorise the granting of this licence.

1  
2  
3  
4 **suPAR as a prognostic marker of mortality in healthy, general, and patient populations:**  
5  
6  
7 **protocol for a systematic review and meta-analysis**  
8  
9

10  
11 **Authors:**  
12  
13

14  
15 Jens Emil Vang Petersen,<sup>1</sup> Thomas Kalleemose,<sup>2</sup> Karen D. Barton,<sup>3</sup> Avshalom Caspi,<sup>4,5,6,7</sup> Line  
16

17  
18 Jee Hartmann Rasmussen<sup>2,4</sup>  
19  
20

21  
22 <sup>1</sup>Department of Infectious Diseases, Duke University, Durham, NC, USA  
23  
24

25 <sup>2</sup>Clinical Research Centre, Copenhagen University Hospital Amager and Hvidovre, Hvidovre,  
26  
27  
28 Denmark  
29  
30

31 <sup>3</sup>Duke University Medical Center Library & Archives, Duke University, Durham, NC, USA  
32  
33

34 <sup>4</sup>Department of Psychology and Neuroscience, Duke University, Durham, NC, USA  
35  
36

37  
38 <sup>5</sup>Department of Psychiatry and Behavioral Sciences, Duke University School of Medicine,  
39  
40  
41 Durham, NC, USA  
42  
43

44 <sup>6</sup>Center for Genomic and Computational Biology, Duke University, Durham, NC, USA  
45  
46

47 <sup>7</sup>Social, Genetic, and Developmental Psychiatry Centre, Institute of Psychiatry, Psychology, and  
48  
49  
50 Neuroscience, King's College London, London, UK  
51  
52  
53

1  
2  
3 E-mail: Jens E V Petersen [jensemilvang.petersen@duke.edu](mailto:jensemilvang.petersen@duke.edu) – Thomas Kallelose

4  
5  
6 [thomas.kallelose@regionh.dk](mailto:thomas.kallelose@regionh.dk) – Karen Barton [karen.d.barton@duke.edu](mailto:karen.d.barton@duke.edu) – Avshalom Caspi

7  
8  
9 [avshalom.caspi@duke.edu](mailto:avshalom.caspi@duke.edu) – Line J H Rasmussen [line.jee.hartmann.rasmussen@duke.edu](mailto:line.jee.hartmann.rasmussen@duke.edu)

10  
11  
12  
13 **Corresponding author:**

14  
15  
16 Line Jee Hartmann Rasmussen

17  
18  
19 Dept. of Psychology and Neuroscience

20  
21  
22 2020 W Main St, Suite 201

23  
24  
25  
26  
27 Durham, NC 27705, USA

28  
29  
30  
31 Clinical Research Centre

32  
33  
34 Hvidovre Hospital

35  
36  
37 Kettegård Allé 30

38  
39  
40 DK-2650 Hvidovre, Denmark

41  
42  
43  
44 **Word count: 3,982**

45  
46  
47  
48 **Registration:**

1  
2  
3 In accordance with the guidelines, our systematic review protocol was registered with the  
4  
5  
6 International Prospective Registry of Systematic Reviews (PROSPERO) on [DATE] (registration  
7  
8  
9 number CRDXXX).

10  
11  
12  
13  
14  
15  
16  
17 [Notes regarding protocol registration at PROSPERO:  
18

19  
20  
21 This study will be registered at PROSPERO, however, as PROSPERO has the following  
22  
23 recommendation: "*Ensure that your review protocol is in its (near) final form and that no major*  
24  
25 *changes are anticipated at this stage - e.g. if your protocol will be peer reviewed it will usually be*  
26  
27 *sensible to wait until this is complete before registering*" we will wait with the registration until the  
28  
29  
30  
31  
32  
33  
34 protocol has been peer-reviewed.

35  
36  
37  
38 Moreover, from 1st of October, 2019, PROSPERO only accept reviews provided that data  
39  
40  
41 extraction has not yet started. We have therefore not begun the search or data extraction yet,  
42  
43  
44 and all instances requiring a "date of search" in the protocol have been marked as "[search  
45  
46  
47  
48  
49  
50  
51  
52  
53  
54  
55  
56  
57  
58  
59  
60  
[date]". This date will be completed after peer review but before publication of this protocol  
60  
61  
62  
63  
64  
65  
66  
67  
68  
69  
70  
71  
72  
73  
74  
75  
76  
77  
78  
79  
80  
81  
82  
83  
84  
85  
86  
87  
88  
89  
90  
91  
92  
93  
94  
95  
96  
97  
98  
99  
100  
101  
102  
103  
104  
105  
106  
107  
108  
109  
110  
111  
112  
113  
114  
115  
116  
117  
118  
119  
120  
121  
122  
123  
124  
125  
126  
127  
128  
129  
130  
131  
132  
133  
134  
135  
136  
137  
138  
139  
140  
141  
142  
143  
144  
145  
146  
147  
148  
149  
150  
151  
152  
153  
154  
155  
156  
157  
158  
159  
160  
161  
162  
163  
164  
165  
166  
167  
168  
169  
170  
171  
172  
173  
174  
175  
176  
177  
178  
179  
180  
181  
182  
183  
184  
185  
186  
187  
188  
189  
190  
191  
192  
193  
194  
195  
196  
197  
198  
199  
200  
201  
202  
203  
204  
205  
206  
207  
208  
209  
210  
211  
212  
213  
214  
215  
216  
217  
218  
219  
220  
221  
222  
223  
224  
225  
226  
227  
228  
229  
230  
231  
232  
233  
234  
235  
236  
237  
238  
239  
240  
241  
242  
243  
244  
245  
246  
247  
248  
249  
250  
251  
252  
253  
254  
255  
256  
257  
258  
259  
260  
261  
262  
263  
264  
265  
266  
267  
268  
269  
270  
271  
272  
273  
274  
275  
276  
277  
278  
279  
280  
281  
282  
283  
284  
285  
286  
287  
288  
289  
290  
291  
292  
293  
294  
295  
296  
297  
298  
299  
300  
301  
302  
303  
304  
305  
306  
307  
308  
309  
310  
311  
312  
313  
314  
315  
316  
317  
318  
319  
320  
321  
322  
323  
324  
325  
326  
327  
328  
329  
330  
331  
332  
333  
334  
335  
336  
337  
338  
339  
340  
341  
342  
343  
344  
345  
346  
347  
348  
349  
350  
351  
352  
353  
354  
355  
356  
357  
358  
359  
360  
361  
362  
363  
364  
365  
366  
367  
368  
369  
370  
371  
372  
373  
374  
375  
376  
377  
378  
379  
380  
381  
382  
383  
384  
385  
386  
387  
388  
389  
390  
391  
392  
393  
394  
395  
396  
397  
398  
399  
400  
401  
402  
403  
404  
405  
406  
407  
408  
409  
410  
411  
412  
413  
414  
415  
416  
417  
418  
419  
420  
421  
422  
423  
424  
425  
426  
427  
428  
429  
430  
431  
432  
433  
434  
435  
436  
437  
438  
439  
440  
441  
442  
443  
444  
445  
446  
447  
448  
449  
450  
451  
452  
453  
454  
455  
456  
457  
458  
459  
460  
461  
462  
463  
464  
465  
466  
467  
468  
469  
470  
471  
472  
473  
474  
475  
476  
477  
478  
479  
480  
481  
482  
483  
484  
485  
486  
487  
488  
489  
490  
491  
492  
493  
494  
495  
496  
497  
498  
499  
500  
501  
502  
503  
504  
505  
506  
507  
508  
509  
510  
511  
512  
513  
514  
515  
516  
517  
518  
519  
520  
521  
522  
523  
524  
525  
526  
527  
528  
529  
530  
531  
532  
533  
534  
535  
536  
537  
538  
539  
540  
541  
542  
543  
544  
545  
546  
547  
548  
549  
550  
551  
552  
553  
554  
555  
556  
557  
558  
559  
560  
561  
562  
563  
564  
565  
566  
567  
568  
569  
570  
571  
572  
573  
574  
575  
576  
577  
578  
579  
580  
581  
582  
583  
584  
585  
586  
587  
588  
589  
590  
591  
592  
593  
594  
595  
596  
597  
598  
599  
600  
601  
602  
603  
604  
605  
606  
607  
608  
609  
610  
611  
612  
613  
614  
615  
616  
617  
618  
619  
620  
621  
622  
623  
624  
625  
626  
627  
628  
629  
630  
631  
632  
633  
634  
635  
636  
637  
638  
639  
640  
641  
642  
643  
644  
645  
646  
647  
648  
649  
650  
651  
652  
653  
654  
655  
656  
657  
658  
659  
660  
661  
662  
663  
664  
665  
666  
667  
668  
669  
670  
671  
672  
673  
674  
675  
676  
677  
678  
679  
680  
681  
682  
683  
684  
685  
686  
687  
688  
689  
690  
691  
692  
693  
694  
695  
696  
697  
698  
699  
700  
701  
702  
703  
704  
705  
706  
707  
708  
709  
710  
711  
712  
713  
714  
715  
716  
717  
718  
719  
720  
721  
722  
723  
724  
725  
726  
727  
728  
729  
730  
731  
732  
733  
734  
735  
736  
737  
738  
739  
740  
741  
742  
743  
744  
745  
746  
747  
748  
749  
750  
751  
752  
753  
754  
755  
756  
757  
758  
759  
760  
761  
762  
763  
764  
765  
766  
767  
768  
769  
770  
771  
772  
773  
774  
775  
776  
777  
778  
779  
780  
781  
782  
783  
784  
785  
786  
787  
788  
789  
790  
791  
792  
793  
794  
795  
796  
797  
798  
799  
800  
801  
802  
803  
804  
805  
806  
807  
808  
809  
810  
811  
812  
813  
814  
815  
816  
817  
818  
819  
820  
821  
822  
823  
824  
825  
826  
827  
828  
829  
830  
831  
832  
833  
834  
835  
836  
837  
838  
839  
840  
841  
842  
843  
844  
845  
846  
847  
848  
849  
850  
851  
852  
853  
854  
855  
856  
857  
858  
859  
860  
861  
862  
863  
864  
865  
866  
867  
868  
869  
870  
871  
872  
873  
874  
875  
876  
877  
878  
879  
880  
881  
882  
883  
884  
885  
886  
887  
888  
889  
890  
891  
892  
893  
894  
895  
896  
897  
898  
899  
900  
901  
902  
903  
904  
905  
906  
907  
908  
909  
910  
911  
912  
913  
914  
915  
916  
917  
918  
919  
920  
921  
922  
923  
924  
925  
926  
927  
928  
929  
930  
931  
932  
933  
934  
935  
936  
937  
938  
939  
940  
941  
942  
943  
944  
945  
946  
947  
948  
949  
950  
951  
952  
953  
954  
955  
956  
957  
958  
959  
960  
961  
962  
963  
964  
965  
966  
967  
968  
969  
970  
971  
972  
973  
974  
975  
976  
977  
978  
979  
980  
981  
982  
983  
984  
985  
986  
987  
988  
989  
990  
991  
992  
993  
994  
995  
996  
997  
998  
999  
1000

Source: <https://www.crd.york.ac.uk/PROSPERO/>]

**Contributions:**

JEVP and LJHR are the guarantors of the review. All authors contributed to the development of the selection criteria, the risk of bias assessment strategy, and data extraction criteria. LJHR and JEVF conceived the study. JEVF, KB, and LJHR developed the search strategy. TK provided statistical expertise. JEVF and LJHR drafted the protocol. All authors read, provided feedback, and approved the final protocol.

**Amendments:**

In the event of protocol amendments, the date of each amendment will be accompanied by a description of the change and the rationale for the change in this section. An updated protocol will be identified with a new version number and a list of the specific amendments that were made to the previous version, in accordance with the Preferred Reporting Items for Systematic review and Meta-Analysis Protocols (PRISMA-P) guidelines.

**Funding statement:**

1  
2  
3 This research received no specific grant from any funding agency in the public, commercial, or  
4  
5  
6 not-for-profit sectors. JEVP is supported by an international postdoc fellowship from the Alfred  
7  
8  
9 Benzon Foundation (grant no. ABF-2018-91). LJHR is supported by an international postdoc  
10  
11  
12 fellowship from the Lundbeck Foundation (grant no. R288-2018-380). The funders had no role  
13  
14  
15 in designing the project or developing the protocol, neither will they have any role in the review  
16  
17  
18 conduct, data analysis and interpretation, or publication of the study results.  
19  
20  
21  
22

### 23 **Competing interests:**

24  
25  
26  
27 LJHR has received funding from travel outside the submitted work from ViroGates A/S. The  
28  
29  
30 remaining authors report no conflicts of interest.  
31  
32  
33

### 34 **ABSTRACT**

35  
36  
37  
38 **Introduction:** Chronic inflammation is increasingly recognized as a major contributor to disease,  
39  
40  
41 disability, and ultimately death, but measuring the levels of chronic inflammation remains non-  
42  
43  
44 canonized, making it difficult to relate chronic inflammation and mortality. *Soluble urokinase*  
45  
46  
47 *plasminogen activator receptor* (suPAR), an emerging biomarker of chronic inflammation, has  
48  
49  
50 been proposed as a prognostic biomarker associated with future incidence of chronic disease  
51  
52  
53 and mortality in general as well as patient populations. Proper prognostic biomarkers are  
54  
55  
56  
57  
58  
59  
60



1  
2  
3 important as they can help improve risk stratification in clinical settings and provide guidance in  
4  
5  
6 treatment or lifestyle decisions as well as in the design of randomized trials. Here, we wish to  
7  
8  
9  
10 summarize the evidence about the overall association of the biomarker suPAR with mortality in  
11  
12  
13 healthy, general, and patient populations across diseases.

14  
15  
16  
17 **Methods and analysis:** The search will be conducted using Medline, Embase, and Scopus

18  
19  
20 databases from their inception to identify studies investigating “suPAR” and “mortality”.

21  
22  
23 Observational studies and control groups from intervention studies written in English or Danish  
24  
25  
26 will be included. The “Quality In Prognosis Studies” tool will be used to assess the risk of bias  
27  
28  
29 for the studies included. Unadjusted and adjusted mortality outcome measures (e.g., risk ratios,  
30  
31  
32 odds ratios, hazard ratios) with 95% CIs will be extracted for healthy individuals, general and  
33  
34  
35 patient populations. The primary outcome is all-cause mortality within any given follow-up.  
36  
37

38  
39 Subgroup analyses will be performed based on time of outcome, cause of death, population  
40  
41  
42 type, adjustments for conventional risk factors and inflammation markers, etc.  
43  
44

45  
46 **Ethics and dissemination:** This systematic review will synthesize evidence on the use of suPAR  
47  
48  
49 as a prognostic marker for mortality. The results will be disseminated by publication in a peer-  
50  
51

1  
2  
3 reviewed journal. Data used will be obtained from published studies, and ethics approval is  
4  
5  
6 therefore not necessary for this systematic review.  
7  
8  
9

10 **Trial registration number:** PROSPERO [CRDXXX].  
11  
12  
13

## 14 **STRENGTHS AND LIMITATIONS OF THIS STUDY**

15  
16  
17

- 18 - To the best of our knowledge, this is the first systematic review and meta-analysis that  
19  
20  
21 investigates the association between suPAR and mortality across general and patient  
22  
23  
24 populations.  
25  
26
- 27 - This review will provide valuable new knowledge for researchers studying chronic  
28  
29  
30 inflammation's effect on both short- and long-term health, and for clinicians using suPAR  
31  
32  
33 in clinical settings to stratify patients.  
34  
35
- 36 - Study selection, data extraction, and quality assessment will be performed  
37  
38  
39 independently by two reviewers.  
40  
41  
42
- 43 - The results will be discussed in context with other studies in the field.  
44  
45
- 46 - Common to most meta-analyses, significant heterogeneity may exist, which will be  
47  
48  
49 investigated thoroughly with subgroup analyses and meta-regressions.  
50  
51  
52  
53  
54  
55  
56  
57

## INTRODUCTION

### Rationale:

Chronic inflammation is increasingly recognized as a major contributor to disease, disability, and ultimately death in industrialized and developing countries alike.<sup>1-4</sup> Chronic inflammation is related to multiple genetic and lifestyle factors, but measuring the levels of chronic inflammation remains non-canonized, making it difficult to relate chronic inflammation and death. *Soluble urokinase plasminogen activator receptor* (suPAR) is a protein present in the blood, and its concentration is thought to reflect a person's level of chronic inflammation and immune activation.<sup>5,6</sup> Thus, elevated suPAR is proposed as a prognostic biomarker associated with future incidence of chronic disease and mortality in general as well as patient populations,<sup>7,8</sup> including previous systematic reviews and meta-analyses showing suPAR to be elevated in focal segmental glomerulosclerosis<sup>9,10</sup> or to be associated with mortality in patients with bacterial infections and sepsis.<sup>11-14</sup> While healthy persons generally have a low level of suPAR in the blood,<sup>15</sup> the blood concentration of suPAR is increased in a wide range of diseases: acute and chronic, non-communicable and infectious, i.e., suPAR has been shown to be elevated in cardiovascular diseases (stroke, ischemic heart disease, venous thromboembolism, incident

1  
2  
3 atrial fibrillation),<sup>16–18</sup> type 1 and type 2 diabetes,<sup>19–21</sup> various types of cancer,<sup>22–36</sup> rheumatic  
4  
5  
6 disease,<sup>37,38</sup> chronic pulmonary disease,<sup>39</sup> chronic liver disease (non-alcoholic fatty liver  
7  
8  
9 disease, cirrhosis),<sup>40–42</sup> chronic kidney disease<sup>43,44</sup> as well as infectious diseases caused by  
10  
11  
12 viruses<sup>42,45–47</sup>, bacteria<sup>48–57</sup>, and parasites<sup>58,59</sup>. Together, these studies highlight the broad  
13  
14  
15  
16 associations across patient groups and etiologies—and even in general populations—between  
17  
18  
19 elevated blood levels of suPAR with general health, disease outcome, complications, and  
20  
21  
22  
23 mortality.

24  
25  
26 In contrast to common inflammatory biomarkers, such as the current gold standard C-reactive  
27  
28  
29 protein (CRP), suPAR is not an acute-phase reactant, and suPAR levels in the blood are less  
30  
31  
32 rapidly affected by acute changes and short-term influences.<sup>17,60</sup> Additionally suPAR was more  
33  
34  
35  
36 reliably associated with early-life risk factors such as adverse childhood experiences, early-life  
37  
38  
39 stress, and violence than CRP and interleukin-6 (IL-6), potentially because these more  
40  
41  
42 traditional biomarkers of inflammation as acute-phase reactants mix historical and acute  
43  
44  
45 effects.<sup>61,62</sup> This, along with its non-specific associations with pathologies in general, suggests  
46  
47  
48  
49 that suPAR blood levels are an appropriate readout for chronic inflammation.

1  
2  
3 Prognostic biomarkers are important as they can help improve risk stratification in clinical  
4  
5  
6 settings or provide guidance in treatment or lifestyle decisions as well as in the design of  
7  
8  
9 randomized trials.<sup>63</sup> Here, we wish to summarize the evidence about the overall association of  
10  
11  
12 the biomarker suPAR with mortality in healthy, general, and patient populations and across  
13  
14  
15 diseases. As suPAR is still a relatively new clinical biomarker, clinical guidelines and cut-offs are  
16  
17  
18 still lacking. Our findings will clarify the association between suPAR and mortality, and what  
19  
20  
21 value a biomarker reflecting chronic inflammation adds, compared to the current standard  
22  
23  
24 inflammatory biomarkers. The study will help development of future clinical guidelines, based on  
25  
26  
27 a better understanding of differences in the prognostic value of suPAR between and across  
28  
29  
30 healthy individuals and patient subgroups, which is critical in clinical decision-making. Having an  
31  
32  
33 established accurate chronic inflammation biomarker with a well-described association with  
34  
35  
36 mortality is a vital tool in future efforts to combat major public health challenges.  
37  
38  
39  
40  
41

42 **Objective:**

43  
44  
45  
46 In this systematic review, we aim to investigate the hypothesis that elevated suPAR is  
47  
48  
49 associated with increased risk of short-term and long-term mortality in healthy, general, and  
50  
51  
52 patient populations, independent of conventional risk factors.  
53  
54  
55  
56  
57

To this end, the proposed systematic review will answer the following questions:

Primary aim:

1. Do individuals with higher suPAR levels have a higher risk of mortality?

Secondary aims:

2. Is the association between suPAR and mortality present in healthy, general, and various patient populations?
3. Is the association between suPAR and mortality independent of conventional risk factors, such as age, sex, smoking, and chronic disease?
4. Is the association between suPAR and mortality independent of other inflammatory biomarkers?
5. What is the discrimination performance of suPAR for predicting mortality?
6. What clinical and study methodological characteristics explain heterogeneity in the results?

## METHODS AND ANALYSIS

### Review design:

The study protocol for this systematic review and meta-analysis was developed based on the PRISMA-P guidelines<sup>64,65</sup> and was registered with PROSPERO (registration number CRDXXX).

This study will follow the recommendations on conducting and reporting systematic reviews and meta-analyses set forth by the PRISMA<sup>66</sup> and Meta-analysis of observational studies in epidemiology (MOOSE)<sup>67</sup> guidelines, as well as the updated CHARMS checklist for prognostic factors CHARMS-PF.<sup>63</sup>

### Eligibility criteria:

Studies on suPAR and mortality will be selected according to the criteria outlined below.

Study designs: We will include prospective or retrospective observational studies (cohorts, case-control studies, nested case-control studies) and control groups from intervention studies.

We will exclude animal experiments.

1  
2  
3 Participants: We will include studies examining healthy human individuals, general human  
4  
5  
6 populations, or any human patient population. We will include studies of both children and  
7  
8  
9 adults without restrictions on ethnicity, sex, or disease status.  
10  
11

12  
13 Index prognostic factor: We will include studies with suPAR measured in plasma or serum,  
14  
15  
16 independent of assay type, manufacturer, or sample storage time and conditions (whether  
17  
18  
19 suPAR was measured in fresh or frozen samples); this information will be collected for quality  
20  
21  
22 assessment and heterogeneity analysis (described below in detail). We will exclude studies  
23  
24  
25 where suPAR was not measured in blood (e.g., urine samples).  
26  
27  
28

29  
30 Comparators: We will investigate the unadjusted and adjusted prognostic value of suPAR, i.e.,  
31  
32  
33 without and with adjustments for other prognostic factors, e.g., conventional risk factors (such  
34  
35  
36 as age, sex, smoking, and chronic disease) or inflammatory biomarkers (such as CRP, white  
37  
38  
39 blood cells, and IL-6).  
40  
41  
42

43  
44 Outcomes: We will investigate the outcome of mortality. We will include studies with outcomes  
45  
46  
47 reported as unadjusted or adjusted effect estimates of relative risk (e.g., risk ratio [RR], odds  
48  
49  
50 ratio [OR], hazard ratio [HR]). In studies reporting mortality as part of a composite outcome  
51  
52  
53 measure, we will extract all individual outcomes as reported in the studies. We will extract the  
54  
55  
56



1  
2  
3 outcome in all data forms (for example, dichotomous—30-day mortality yes/no; continuous—  
4  
5  
6 time to death) as reported in the included studies. For studies reporting survival from time-to-  
7  
8  
9 event analyses, we will use this information to extract the number of deaths. Further, we will  
10  
11  
12 investigate the discriminative ability of suPAR as a secondary outcome, i.e., area under the  
13  
14  
15 curves (AUCs) for receiver operating characteristics (ROC) curve analyses of suPAR and  
16  
17  
18 mortality. We will exclude studies of deaths due to external/unnatural causes, such as homicide,  
19  
20  
21 suicides, accidents, drug overdoses, and medical errors.  
22  
23

24  
25  
26 Timing: We will investigate the association between suPAR and mortality during any given  
27  
28  
29 period of follow-up. We will exclude cross-sectional studies.  
30  
31

32  
33  
34 Setting: There will be no restrictions by type of setting.  
35  
36

37  
38 Language and publication type: We will include peer-reviewed studies in English or Danish  
39  
40 published up to [search date]. We will exclude reviews, commentaries, correspondence, case  
41  
42  
43 reports, conference abstracts, expert opinions, editorials, experimental studies, and  
44  
45  
46 dissertations. A list of possibly relevant titles in other languages will be provided as an appendix.  
47  
48  
49

50  
51 **Information sources:**  
52  
53  
54  
55  
56  
57  
58  
59  
60

1  
2  
3 The following databases will be searched from their inception forward for potentially eligible  
4  
5  
6 studies published on or before [search date]: 1) Medline via PubMed, 2) Embase via Elsevier,  
7  
8  
9 and 3) Scopus via Elsevier. The electronic database search will be supplemented with a hand  
10  
11  
12 search of reference lists of included studies, etc. Finally, we will circulate a bibliography of the  
13  
14  
15 included articles to the systematic review team, as well as to suPAR experts identified by the  
16  
17  
18 team. The electronic databases search will be carried out by KB (Biomedical Research Liaison  
19  
20  
21 Librarian), and the supplemental hand search will be carried out by JEVF and LJHR.  
22  
23  
24  
25

### 26 **Search strategy:**

27  
28  
29  
30 The specific search strategy was created by a Biomedical Research Liaison Librarian (KB) with  
31  
32  
33 expertise in systematic review searching. The search strategy was developed with input from  
34  
35  
36 the project team. The search uses medical subject headings (MeSH) terms and keywords  
37  
38  
39 related to suPAR and mortality. No study design, date, or language limits will be imposed on the  
40  
41  
42 search. The following terms will be used to search the electronic databases in addition to other  
43  
44  
45 related terms for the concepts of “suPAR” and “mortality”:  
46  
47  
48  
49

50 “suPAR” or “soluble urokinase plasminogen activator receptor” or “soluble urokinase-type” or  
51  
52  
53 “uPAR”  
54  
55  
56  
57

1  
2  
3 AND  
4  
5

6  
7 “mortality” or “death” or “fatality”  
8  
9

10  
11 The initial search will be performed in [search date; tentatively December 2019]. Searches will  
12  
13 be repeated prior to publication. An example of the PubMed search and search terms is shown  
14  
15 in **Appendix 1**.  
16  
17  
18  
19

20  
21 **Study records:**  
22

23  
24  
25 *Data management:*  
26

27  
28  
29 Citations extracted from electronic databases will be imported to EndNote. The Covidence  
30  
31 systematic review software will be used for the screening and review processes, including  
32  
33 removal of duplicates. For the actual data extraction, a data codebook will be a priori developed  
34  
35 in Microsoft Excel based on a pilot search, along with a manual describing the information to be  
36  
37 entered under each data item in the codebook.  
38  
39  
40  
41  
42  
43

44  
45  
46 *Selection process:*  
47

48  
49 Two reviewers (JEVP, LJHR) will independently screen titles and abstracts yielded by the  
50  
51 search to identify eligible studies according to the inclusion criteria. Studies that do not meet the  
52  
53  
54  
55  
56  
57

1  
2  
3 screening criteria will be excluded. We will obtain full reports for all titles that appear to meet the  
4  
5  
6 inclusion criteria or where there is any uncertainty. The same two reviewers (JEVP, LJHR) will  
7  
8  
9 independently review the full-text articles to assess for eligibility. The included and excluded  
10  
11  
12 studies will be checked and reasons for inclusion/exclusion will be verified. Disagreements will  
13  
14  
15 be resolved by consensus, or by a third author if necessary. Reasons for exclusion will be  
16  
17  
18 coded for both the initial screening and for the review of the full-text articles. The PRISMA flow  
19  
20  
21 diagram will be used to document the study selection process. An appendix with a reference list  
22  
23  
24 of all excluded studies will be included in the final manuscript. Neither of the reviewers will be  
25  
26  
27 blind to the article titles, study authors, or institutions. Multiple reports of a single study will be  
28  
29  
30 identified by juxtaposing author names, study names, institutions, study dates, etc. To avoid  
31  
32  
33 double counting, in cases of duplicate publications or multiple reports from the same study that  
34  
35  
36 all meet the inclusion criteria, the reviewers will select publications based on the following  
37  
38  
39 prioritization: reports with 1) adjusted analyses; 2) more covariates included; 3) bigger sample  
40  
41  
42 size. In cases where different reports from the same study provide unique data on different  
43  
44  
45 follow-up times, adjustments, or subgroups, unique information from the individual reports will  
46  
47  
48 be extracted for the main analysis, subgroup analyses, and meta-regressions.  
49  
50  
51  
52  
53  
54

55 ***Data collection process:***  
56  
57

1  
2  
3 Data will be extracted from reports and entered in the Excel codebook in duplicate by the two  
4  
5  
6 independent reviewers (JEVP, LJHR). As mentioned, the data extraction codebook is developed  
7  
8  
9 a priori with statistical consultancy from TK. To ensure consistency across reviewers, we will  
10  
11  
12 conduct calibration exercises before starting the review. The extracted data will include all the  
13  
14  
15 necessary information to describe and characterize the studies, assess the quality, synthesize  
16  
17  
18 data for the meta-analyses, and to assess heterogeneity. In case of missing data or insufficient  
19  
20  
21 reporting of details, the study's corresponding author will be contacted for clarification, if  
22  
23  
24 possible, by a maximum of three e-mail attempts. When data extraction is completed, both  
25  
26  
27 authors will review the codebooks and resolve any discrepancies by consensus or by a third  
28  
29  
30 author if necessary. Prior to correcting disagreements, the overall inter-rater agreement rate will  
31  
32  
33 be calculated using Cohen's  $\kappa$  statistic ( $>0.80$  is considered good). A list of extracted variables  
34  
35  
36 will be provided as an appendix in the final manuscript. For studies consisting of multiple groups  
37  
38  
39 of individuals (for example, healthy controls, patients with precancerous lesions, and patients  
40  
41  
42 with cancer), individual group information will be extracted to assess the association between  
43  
44  
45 suPAR and mortality for each group.  
46  
47  
48  
49  
50

51  
52 **Data items:**  
53  
54  
55  
56  
57

1  
2  
3 The major categories of extracted data will be: (1) study characteristics (author, journal, year of  
4  
5  
6 publication, country/region, funding sources, etc.); (2) study design (type of study, year of study  
7  
8  
9 start, duration of follow-up, etc.); (3) study population (sample size at baseline, population  
10  
11  
12 characteristics (healthy individuals, general population, patient types), age, sex, sample size at  
13  
14  
15 follow-up, reasons for loss to follow-up, information about treatments, etc.), (4) index suPAR  
16  
17  
18 (suPAR levels, distribution, assay type, manufacturer, comparison groups and cut-offs, etc.); (5)  
19  
20  
21 outcomes (including mortality/survival rates; cause of death; suPAR levels stratified by  
22  
23  
24 survivors/non-survivors; unadjusted, minimally adjusted, and most adjusted RR, OR and/or HR  
25  
26  
27 for short-term and long-term all-cause mortality; and AUCs for ROC curves); (6) control  
28  
29  
30 characteristics (conventional risk factors, e.g., age, sex, smoking, and chronic diseases, and  
31  
32  
33 other inflammatory biomarkers, e.g., C-reactive protein (CRP), white blood cells, cytokines,  
34  
35  
36 fibrinogen, etc.); (7) setting (general population, healthcare setting, e.g., acute care, ICU,  
37  
38  
39 outpatients, etc.).  
40  
41  
42  
43  
44  
45

#### 46 **Outcomes and prioritization:**

47  
48

49 The primary outcome is all-cause mortality within any given follow-up period. Reports that are  
50  
51  
52 not indicating cause of deaths will be analyzed under all-cause mortality.  
53  
54  
55  
56  
57

1  
2  
3  
4 When studies report mortality/survival rates at various time points of the follow-up, we have  
5  
6 decided a priori to subdivide the mortality rates as follows:  
7

- 10 1. Short-term mortality: Death within 30 days from baseline.
- 12 2. 30-365-day mortality: Death occurring between 30 days and 365 days from baseline.
- 14 3. Long-term mortality: Death occurring more than 365 days from baseline.

18  
19  
20 For the primary meta-analysis, the most long-term outcome will be used, i.e., if a study reports  
21  
22 associations between suPAR and mortality at multiple timepoints, the more long-term  
23  
24 assessment of mortality will be used. Furthermore, we will conduct subgroup analyses  
25  
26 stratifying studies reporting mortality within 30 days, between 30-365 days, and more than 365  
27  
28 days, as described in detail in the "*Subgroup analyses and meta-regression*" section below.  
29  
30  
31  
32  
33  
34  
35  
36  
37

38 Secondary outcomes will be:

- 40 1. Short-term mortality (within 30 days) of any cause (all-cause mortality)
- 42 2. Cardiovascular mortality
- 44 3. Cancer mortality
- 46 4. Discriminative ability of suPAR, i.e., AUCs for ROC curves of suPAR and mortality for  
48  
49  
50  
51  
52  
53  
54 the most long-term outcome reported

### Risk of bias in individual studies (quality assessment):

To facilitate the assessment of possible risk of bias, the methodological quality of each study will be evaluated using the Quality in Prognosis Studies (QUIPS) tool, **Table 1**.<sup>68</sup> The QUIPS tool assesses risk of bias across six domains in studies of prognostic factors: (1) study participation (sampling bias); (2) study attrition (attrition bias); (3) prognostic factor measurement; (4) outcome measurement; (5) study confounding; and (6) statistical analysis and reporting. The QUIPS tool will be adapted to meet the specific needs of this systematic review. To ensure consistency across reviewers, we will conduct calibration exercises before starting the quality assessments. Neither of the reviewers will be blinded to studies during the quality assessment. For each domain in the tool, we will describe the procedures undertaken for each study, including verbatim quotes. If there is insufficient detail reported in the study, we will judge the risk of bias as “unclear” and the study’s authors will be contacted for more information. Studies will be considered to have a low, moderate, or high risk of bias according to the following scores of low risk across domains: 5-6, 3-4, 0-2. The two reviewers (JEVP, LJHR) will assess the risk of bias independent of each other. Any disagreements will be resolved by consensus, or if necessary by a third author. No study will be excluded based on the results of risk of bias assessment. We will compute graphic representations of potential bias for the final manuscript.



1  
2  
3 In the meta-analysis, subgroup analyses will be performed based on the risk of bias (QUIPS;  
4  
5  
6 low, moderate, or high risk of bias). The adapted QUIPS tool will be provided as an appendix in  
7  
8  
9  
10 the final manuscript.

#### 11 12 13 **Data synthesis:**

14  
15  
16  
17 Reported relative risks and their corresponding 95-99% confidence intervals will be used to  
18  
19  
20 assess the association between suPAR and most long-term mortality with random-effects meta-  
21  
22  
23 analyses to minimize between-study heterogeneity. A quantitative synthesis will be performed,  
24  
25  
26 and our outcomes will be studied separately in three pooled datasets: i) across all studies  
27  
28  
29 (despite a high degree of expected heterogeneity), ii) within studies of healthy/general  
30  
31  
32 populations, and iii) within studies of patient populations.  
33  
34  
35

36  
37 As previously described for CRP and albumin,<sup>69,70</sup> we will convert the reported study-specific  
38  
39  
40 relative risk estimates for suPAR onto a standardized scale of effect, comparing the highest  
41  
42  
43 third with the lowest third of the suPAR distribution, i.e., providing an estimate per 2.18 times  
44  
45  
46 standard deviation (SD) units of suPAR. 2.18 is the difference in the means of the top and  
47  
48  
49 bottom third of the standard normal distribution and is therefore used as the point estimate for  
50  
51  
52  
53 the lower and upper third of the suPAR distribution when scaled with SD. This method assumes  
54  
55  
56  
57  
58  
59  
60

1  
2  
3 that suPAR follows a normal distribution, or a transformation of suPAR, such as the logarithm,  
4  
5  
6 follows a normal distribution. Additionally, it is assumed that the suPAR SD estimates within the  
7  
8  
9 studies are similar when scaling; if this is not the case additional adjustment to account for this  
10  
11  
12 will be done and differences between calculation methods will be reported. If we conclude that  
13  
14  
15 these assumptions cannot be made for the studies, separate relative risk estimates (per suPAR  
16  
17  
18 unit,  $\log_2(\text{suPAR})$ , Q1 vs Q4 suPAR, etc.) analysis will be made instead of the standardized  
19  
20  
21 scale analysis.  
22  
23

24  
25  
26 For the primary analysis all study outcome measures (e.g., RR, OR, and HR) will be pooled as a  
27  
28  
29 single measure, and all available studies will be included, regardless of population. If a study  
30  
31  
32 has multiple versions of the same model with different adjustments, the model with most  
33  
34  
35 adjustments will be included. In addition, we will conduct separate subgroup analyses, as  
36  
37  
38 described below, to account for the heterogeneity across methods of reporting outcomes and  
39  
40  
41 variation in adjustments made.  
42  
43

44  
45  
46 As suggested by Riley et al. 2019,<sup>63</sup> in addition to the main analysis, we will conduct multiple  
47  
48  
49 meta-analyses separately based on the most long-term outcome stratified on the following  
50  
51  
52 levels: (1) population level: all data, healthy/general populations, and patients; (2) model  
53  
54  
55

1  
2  
3 adjustment: unadjusted, minimally adjusted (age and sex), adjusted for some conventional risk  
4  
5  
6 factors (e.g., age, sex, chronic disease/Charlson score, smoking) or inflammatory markers (e.g.,  
7  
8  
9 CRP, cytokines, fibrinogen), and maximally adjusted (most adjusted estimate from each study);  
10  
11  
12  
13 (3) outcome measure: RR, OR, and HR.  
14  
15

16  
17 Statistical heterogeneity among studies will be evaluated using the Chi<sup>2</sup> test (significance level:  
18  
19 0.1) and I<sup>2</sup> statistic (I<sup>2</sup> >50% indicates significant heterogeneity across studies). We will try to  
20  
21  
22 explain the source of heterogeneity by subgroup analysis or sensitivity analysis (see below).  
23  
24  
25

26  
27 Study characteristics of the included studies will be summarized in a table. To visually assess  
28  
29  
30 between-study variability, we will present the results and summary relative risks in Forest plots.  
31  
32  
33

34 Pooled estimates of AUCs for ROC curve analyses or equivalent c-statistics of suPAR's  
35  
36  
37 discriminative ability for predicting mortality will be obtained by random effects meta-analysis of  
38  
39  
40 the study-specific AUC's and detection rates (only for studies reporting AUCs).  
41  
42  
43

44 All statistical analyses will be performed using SAS Enterprise Guide (SAS Institute, Cary, NC)  
45  
46  
47 and R (R Foundation for Statistical Computing, Vienna, Austria) software.  
48  
49  
50

51 ***Subgroup analyses and meta-regression:***  
52  
53  
54  
55  
56  
57

1  
2  
3 In addition to the primary analysis of the most long-term mortality, separate analyses will be  
4  
5  
6 made for the following mortality outcomes: mortality within 30 days, 30-365 days, and long-term  
7  
8  
9 mortality (more than 365 days). These analyses will be done as described for the primary  
10  
11  
12 analysis above.  
13  
14  
15

16  
17 Subgroup analyses will be used to explore possible sources of heterogeneity, and univariate  
18  
19 random effects meta-regression will be performed based on the following: study design (cohort,  
20  
21 case-control); year of study start; sex; age groups; time of outcome (within 30 days, 30-365  
22  
23 days, more than 365 days); population type (healthy/general population vs. patient types, e.g.,  
24  
25 cardiovascular disease, cancer, chronic kidney disease, infectious disease, critical illness, acute  
26  
27 care); cause of death studied (all-cause, cardiovascular, cancer mortality, etc.); methods of  
28  
29 suPAR measurement; suPAR assay manufacturer; suPAR comparison group (continuous  
30  
31 suPAR, equal sized groups, unequal sized groups); region (North America + Europe, Asia,  
32  
33 Africa, South America); duration of follow-up; no. of adjustments; adjustment for CRP; no. of  
34  
35 events; risk of bias (QUIPS; low, moderate, high risk of bias).  
36  
37  
38  
39  
40  
41  
42  
43  
44  
45  
46  
47  
48

49 To explore other potential sources of heterogeneity, a random effects meta-regression model  
50  
51  
52 will be employed, which includes study level continuous or categorical covariates.  
53  
54  
55  
56  
57

***Sensitivity analysis:***

Sensitivity analyses will be performed in which the pooled risk estimates are recalculated by removing the studies one by one and comparing the results. Furthermore, a sensitivity analysis of risk of bias will be performed by omitting studies that are judged to be at high risk of bias.

**Meta-biases:**

Small study bias (including publication bias) will be assessed with contour-enhanced Funnel plots, by Begg's adjusted rank correlation test, and by Egger's regression asymmetry test.

**Confidence in cumulative evidence:**

Reporting and interpretation of results will follow the reporting guidelines of PRISMA<sup>66</sup> and MOOSE.<sup>67</sup> Interpretation and translation of summary results will follow these guidelines as well as the steps recommended for prognostic factor studies by Riley et al. 2019.<sup>63</sup> The summary results will be discussed in terms of potential usefulness for clinical practice and need for future research.

Strength in the body of evidence will be further evaluated using the GRADE assessment (Grades of Recommendation, Assessment, Development, and Evaluation).<sup>71,72</sup> However, this approach was developed for the assessment of intervention effectiveness in reviews of

1  
2  
3 interventions and not for assessing the certainty of summary results of systematic reviews of  
4  
5  
6 prognostic factors; allowing for heterogeneity in the latter case may be more acceptable.<sup>63</sup>  
7  
8  
9  
10  
11  
12  
13  
14  
15  
16  
17  
18  
19  
20  
21  
22  
23  
24  
25  
26  
27  
28  
29  
30  
31  
32  
33  
34  
35  
36  
37  
38  
39  
40  
41  
42  
43  
44  
45  
46  
47  
48  
49  
50  
51  
52  
53  
54  
55  
56  
57  
58  
59  
60

For peer review only

## DISCUSSION

The biomarker suPAR has been suggested to be a prognostic biomarker in the general population and various patient populations. However, clinical guidelines and cut-offs are still lacking, hampering the wide clinical utilization of suPAR. Our findings in this systematic review and meta-analysis will clarify the association between suPAR and mortality, and establish its prognostic value across healthy and ill individuals, providing support for development of future clinical guidelines. Thus, we will discuss the usefulness of suPAR in clinical practice, in particular settings, or as a general marker of prognosis across populations.

Only few randomized studies have investigated the value of adding suPAR as a prognostic biomarker to inform clinical practice,<sup>73,74</sup> and most evidence is based on observational studies of suPAR, but many studies have reported an association between suPAR and mortality.

Summarizing this evidence is important to establish the prognostic role of suPAR. This protocol has been developed in compliance with recommended guidelines for prognostic factor studies,<sup>63</sup> including PRISMA-P,<sup>64</sup> and it provides a clear and structured protocol for maximizing data extraction and summarizing the relevant information on the importance of suPAR as a prognostic marker of mortality.

1  
2  
3 suPAR is used as a marker of inflammation, and as such, many studies have compared it with  
4  
5  
6  
7 CRP, although suPAR has been suggested to be a marker of chronic rather than acute  
8  
9  
10 inflammation while CRP is an acute-phase reactant and potentially reflects a distinct aspect of  
11  
12  
13 inflammation. In adjusted analyses, suPAR has been shown to be associated with mortality  
14  
15  
16 independent of CRP.<sup>8,75</sup> In our analyses, we aim to investigate the associations between suPAR  
17  
18  
19 and mortality in studies adjusting for CRP to assess the effect over and above CRP. The  
20  
21  
22 advantage of using a chronic inflammation marker rather than an acute-phase reactant for  
23  
24  
25 prognostication includes the lower variation and sensitivity towards acute, short-term influences  
26  
27  
28 and a better assessment of underlying health status.  
29  
30  
31  
32  
33 Blood suPAR levels have been associated with kidney function<sup>76</sup> and proposed a causal factor  
34  
35  
36 of certain chronic kidney diseases.<sup>77</sup> The potential causal effect in kidney disease is outside the  
37  
38  
39 scope of this review. However, we will investigate whether suPAR is associated with mortality in  
40  
41  
42 individuals with and without chronic kidney disease.  
43  
44  
45

46 Our primary aim of summarizing all evidence of suPAR and mortality in one meta-analysis  
47  
48  
49 imposes a high degree of study population heterogeneity on this study; however, to establish an  
50  
51  
52 association between suPAR and mortality, it is important to summarize the information available  
53  
54  
55  
56  
57



1  
2  
3 on this issue and it will provide us with a general estimate of association. We will account for the  
4  
5  
6 heterogeneity by performing meta-regressions and stratified analyses to investigate the  
7  
8  
9 association in more homogeneous subsets of the literature.  
10  
11

12  
13 This systematic review and meta-analysis will provide an up-to-date global overview of the  
14  
15 current literature on suPAR and mortality. If our results indicate an association between suPAR  
16  
17 level and mortality risk, suPAR may constitute an easily measurable, accurate chronic  
18  
19 inflammation biomarker with a well described association with mortality, which could be a vital  
20  
21 tool in future efforts to combat major public health challenges, such as chronic disease  
22  
23 prevention and premature mortality, and improve future research on this topic.  
24  
25  
26  
27  
28  
29  
30  
31  
32  
33  
34  
35  
36  
37  
38  
39  
40  
41  
42  
43  
44  
45  
46  
47  
48  
49  
50  
51  
52  
53  
54  
55  
56  
57  
58  
59  
60

## REFERENCES

1. Hunter P. The inflammation theory of disease. The growing realization that chronic inflammation is crucial in many diseases opens new avenues for treatment. *EMBO Rep.* 2012;13(11):968-970.
2. Medzhitov R. Inflammation 2010: New Adventures of an Old Flame. *Cell.* 2010;140(6):771-776.
3. Franceschi C, Campisi J. Chronic inflammation (inflammaging) and its potential contribution to age-associated diseases. *J Gerontol A Biol Sci Med Sci.* 2014;69 Suppl 1:S4-9.
4. Michaud M, Balardy L, Moulis G, et al. Proinflammatory cytokines, aging, and age-related diseases. *J Am Med Dir Assoc.* 2013;14(12):877-882.
5. Thunø M, Macho B, Eugen-Olsen J. suPAR: The molecular crystal ball. *Dis Markers.* 2009;27(3):157-172.
6. Desmedt S, Desmedt V, Delanghe JR, Speeckaert R, Speeckaert MM. The intriguing role of soluble urokinase receptor in inflammatory diseases. *Crit Rev Clin Lab Sci.* 2017;54(2):117-133.
7. Eugen-Olsen J, Andersen O, Linneberg A, et al. Circulating soluble urokinase plasminogen activator receptor predicts cancer, cardiovascular disease, diabetes and mortality in the general population. *J Intern Med.* 2010;268(3):296-308.
8. Rasmussen LJH, Ladelund S, Haupt TH, et al. Soluble urokinase plasminogen activator receptor (suPAR) in acute care: A strong marker of disease presence and severity, readmission and mortality. A retrospective cohort study. *Emerg Med J.* 2016;33(11):769-775.
9. Shuai T, Pei Jing Y, Huang Q, et al. Serum soluble urokinase type plasminogen activated receptor

- 1  
2  
3 and focal segmental glomerulosclerosis: A systematic review and meta-analysis. *BMJ Open*.  
4  
5  
6 2019;9(10):e031812.  
7  
8  
9 10. Lee JM, Yang JW, Kronbichler A, et al. Increased serum soluble urokinase-type plasminogen  
10  
11 activator receptor (suPAR) Levels in FSGS: A Meta-Analysis. *J Immunol Res*.  
12  
13 2019;2019:5679518.  
14  
15  
16 11. Pregernig A, Müller M, Held U, Beck-Schimmer B. Prediction of mortality in adult patients with  
17  
18 sepsis using six biomarkers: a systematic review and meta-analysis. *Ann Intensive Care*.  
19  
20 2019;9(1):125.  
21  
22  
23 12. Backes Y, Van Der Sluijs KF, Mackie DP, et al. Usefulness of suPAR as a biological marker in  
24  
25 patients with systemic inflammation or infection: A systematic review. *Intensive Care Med*.  
26  
27 2012;38(9):1418-1428.  
28  
29  
30 13. Ni W, Han Y, Zhao J, et al. Serum soluble urokinase-type plasminogen activator receptor as a  
31  
32 biological marker of bacterial infection in adults: A systematic review and meta-Analysis. *Sci Rep*.  
33  
34 2016;6:39481.  
35  
36  
37 14. Huang Q, Xiong H, Yan P, et al. The Diagnostic and Prognostic Value of Supar in Patients with  
38  
39 Sepsis: A Systematic Review and Meta-Analysis. *Shock*. September 2019.  
40  
41 doi:10.1097/SHK.0000000000001434  
42  
43  
44 15. Hastrup E, Grau K, Eugen-Olsen J, Thorball C, Kessing LV, Ullum H. Soluble urokinase  
45  
46 plasminogen activator receptor as a marker for use of antidepressants. *PLoS One*.  
47  
48  
49  
50  
51  
52  
53  
54  
55  
56  
57  
58  
59  
60

- 2014;9(10):e110555.
16. Persson M, Östling G, Smith G, et al. Soluble Urokinase Plasminogen Activator Receptor: A Risk Factor for Carotid Plaque, Stroke, and Coronary Artery Disease. *Stroke*. 2014;45(1):18-23.
17. Lyngbæk S, Marott JL, Møller D V, et al. Usefulness of soluble urokinase plasminogen activator receptor to predict repeat myocardial infarction and mortality in patients with ST-segment elevation myocardial infarction undergoing primary percutaneous intervention. *Am J Cardiol*. 2012;110(12):1756-1763.
18. Westin O, Rasmussen LJH, Andersen O, Buch E, Eugen-Olsen J, Friberg J. Soluble Urokinase Plasminogen Activator Receptor (suPAR) as a Predictor of Incident Atrial Fibrillation. *J Atr Fibrillation*. 2018;10(6):1801.
19. Theilade S, Lyngbaek S, Hansen TW, et al. Soluble urokinase plasminogen activator receptor levels are elevated and associated with complications in patients with type 1 diabetes. *J Intern Med*. 2015;277(3):362-371.
20. Heraclides A, Jensen TM, Rasmussen SS, et al. The pro-inflammatory biomarker soluble urokinase plasminogen activator receptor (suPAR) is associated with incident type 2 diabetes among overweight but not obese individuals with impaired glucose regulation: Effect modification by smoking and body weight. *Diabetologia*. 2013;56(7):1542-1546.
21. Guthoff M, Wagner R, Randrianarisoa E, et al. Soluble urokinase receptor (suPAR) predicts microalbuminuria in patients at risk for type 2 diabetes mellitus. *Sci Rep*. 2017;7:40627.

- 1  
2  
3  
4 22. Mustjoki S, Sidenius N, Sier CF, et al. Soluble urokinase receptor levels correlate with number of  
5  
6 circulating tumor cells in acute myeloid leukemia and decrease rapidly during chemotherapy.  
7  
8  
9 *Cancer Res.* 2000;60(24):7126-7132.  
10  
11  
12 23. Mustjoki S, Alitalo R, Stephens RW, Vaeheri A. Blast cell-surface and plasma soluble urokinase  
13  
14 receptor in acute leukemia patients: relationship to classification and response to therapy. *Thromb*  
15  
16 *Haemost.* 1999;81(5):705-710.  
17  
18  
19  
20 24. Wach S, Al-Janabi O, Weigelt K, et al. The combined serum levels of miR-375 and urokinase  
21  
22 plasminogen activator receptor are suggested as diagnostic and prognostic biomarkers in prostate  
23  
24 cancer. *Int J Cancer.* 2015;137(6):1406-1416.  
25  
26  
27  
28  
29 25. Cobos E, Jumper C, Lox C. Pretreatment Determination of the Serum Urokinase Plasminogen  
30  
31 Activator and its Soluble Receptor in Advanced Small-Cell Lung Cancer or Non-Small-Cell Lung  
32  
33 Cancer. *Clin Appl Thromb.* 2003;9(3):241-246.  
34  
35  
36  
37  
38 26. Miyake H, Hara I, Yamanaka K, Gohji K, Arakawa S, Kamidono S. Elevation of serum levels of  
39  
40 urokinase-type plasminogen activator and its receptor is associated with disease progression and  
41  
42 prognosis in patients with prostate cancer. *Prostate.* 1999;39(2):123-129.  
43  
44  
45  
46  
47 27. Rigolin GM, Tieghi A, Ciccone M, et al. Soluble urokinase-type plasminogen activator receptor  
48  
49 (suPAR) as an independent factor predicting worse prognosis and extra-bone marrow involvement  
50  
51 in multiple myeloma patients. *Br J Haematol.* 2003;120(6):953-959.  
52  
53  
54  
55  
56 28. Riisbro R, Christensen IJ, Piironen T, et al. Prognostic significance of soluble urokinase  
57  
58  
59  
60

- 1  
2  
3 plasminogen activator receptor in serum and cytosol of tumor tissue from patients with primary  
4  
5  
6 breast cancer. *Clin Cancer Res.* 2002;8(5):1132-1141.  
7  
8
- 9 29. Jing J, Zheng S, Han C, Du L, Guo Y, Wang P. Evaluating the value of uPAR of serum and tissue  
10  
11 on patients with cervical cancer. *J Clin Lab Anal.* 2012;26(1):16-21.  
12  
13
- 14 30. Riisbro R, Stephens RW, Brünner N, et al. Soluble urokinase plasminogen activator receptor in  
15  
16 preoperatively obtained plasma from patients with gynecological cancer or benign gynecological  
17  
18 diseases. *Gynecol Oncol.* 2001;82(3):523-531.  
19  
20  
21
- 22 31. Lomholt AF, Høyer-Hansen G, Nielsen HJ, Christensen IJ. Intact and cleaved forms of the  
23  
24 urokinase receptor enhance discrimination of cancer from non-malignant conditions in patients  
25  
26 presenting with symptoms related to colorectal cancer. *Br J Cancer.* 2009;101(6):992-997.  
27  
28  
29
- 30 32. Usnarska-Zubkiewicz L, Strutyńska-Karpińska M, Zubkiewicz-Kucharska A, Zarębski P,  
31  
32 Grabowski K. Soluble urokinase-type plasminogen activator receptor and ferritin concentration in  
33  
34 patients with advanced alimentary tract carcinoma. Relationship to localization, surgical treatment  
35  
36 and the stage of the disease - Preliminary report. *Adv Clin Exp Med.* 2014;23(6):959-967.  
37  
38  
39
- 40 33. Fidan E, Mentese A, Ozdemir F, et al. Diagnostic and prognostic significance of CA IX and suPAR  
41  
42 in gastric cancer. *Med Oncol.* 2013;30(2):540.  
43  
44  
45
- 46 34. Chounta A, Ellinas C, Tzanetakou V, et al. Serum soluble urokinase plasminogen activator  
47  
48 receptor as a screening test for the early diagnosis of hepatocellular carcinoma. *Liver Int.*  
49  
50  
51  
52  
53  
54  
55  
56 2015;35(2):601-607.  
57

- 1  
2  
3 35. Rubio-Jurado B, Tello-González A, Bustamante-Chávez L, de la Peña A, Riebeling-Navarro C,  
4  
5  
6 Nava-Zavala AH. Circulating Levels of Urokinase-Type Plasminogen Activator Receptor and D-  
7  
8  
9 Dimer in Patients With Hematological Malignancies. *Clin Lymphoma Myeloma Leuk*.  
10  
11  
12 2015;15(10):621-626.  
13  
14  
15 36. Henic E, Borgfeldt C, Christensen IJ, Casslén B, Høyer-Hansen G. Cleaved forms of the  
16  
17  
18 urokinase plasminogen activator receptor in plasma have diagnostic potential and predict  
19  
20  
21 postoperative survival in patients with ovarian cancer. *Clin Cancer Res*. 2008;14(18):5785-5793.  
22  
23  
24 37. Enocsson H, Wetterö J, Skogh T, Sjöwall C. Soluble urokinase plasminogen activator receptor  
25  
26  
27 levels reflect organ damage in systemic lupus erythematosus. *Transl Res*. 2013;162(5):287-296.  
28  
29  
30 38. Toldi G, Bekő G, Kádár G, et al. Soluble urokinase plasminogen activator receptor (suPAR) in the  
31  
32  
33 assessment of inflammatory activity of rheumatoid arthritis patients in remission. *Clin Chem Lab*  
34  
35  
36 *Med*. 2013;51(2):327-332.  
37  
38  
39 39. Portelli MA, Siedlinski M, Stewart CE, et al. Genome-wide protein QTL mapping identifies human  
40  
41  
42 plasma kallikrein as a post-translational regulator of serum uPAR levels. *FASEB J*.  
43  
44  
45 2014;28(2):923-934.  
46  
47  
48 40. Zimmermann HW, Koch A, Seidler S, Trautwein C, Tacke F. Circulating soluble urokinase  
49  
50  
51 plasminogen activator is elevated in patients with chronic liver disease, discriminates stage and  
52  
53  
54 aetiology of cirrhosis and predicts prognosis. *Liver Int*. 2012;32(3):500-509.  
55  
56  
57 41. Wiese S, Mortensen C, Gøtze JP, et al. Cardiac and proinflammatory markers predict prognosis in

- 1  
2  
3 cirrhosis. *Liver Int.* 2014;34(6):e19-30.  
4  
5  
6  
7 42. Sjöwall C, Martinsson K, Cardell K, Ekstedt M, Kechagias S. Soluble urokinase plasminogen  
8  
9 activator receptor levels are associated with severity of fibrosis in nonalcoholic fatty liver disease.  
10  
11  
12 *Transl Res.* 2015;165(6):658-666.  
13  
14  
15 43. Meijers B, Poesen R, Claes K, et al. Soluble urokinase receptor is a biomarker of cardiovascular  
16  
17 disease in chronic kidney disease. *Kidney Int.* 2015;87(1):210-216.  
18  
19  
20  
21 44. Schaefer F, Trachtman H, Wühl E, et al. Association of serum soluble urokinase receptor levels  
22  
23 with progression of kidney disease in children. *JAMA Pediatr.* 2017;171(11):e172914.  
24  
25  
26 45. Sevgi DY, Bayraktar B, Gündüz A, et al. Serum soluble urokinase-type plasminogen activator  
27  
28 receptor and interferon- $\gamma$ -induced protein 10 levels correlate with significant fibrosis in chronic  
29  
30 hepatitis B. *Wien Klin Wochenschr.* 2016;128(1-2):28-33.  
31  
32  
33  
34  
35 46. Sidenius N, Sier CF, Ullum H, et al. Serum level of soluble urokinase-type plasminogen activator  
36  
37 receptor is a strong and independent predictor of survival in human immunodeficiency virus  
38  
39 infection. *Blood.* 2000;96(13):4091-4095.  
40  
41  
42  
43  
44 47. Kirkegaard-Klitbo DM, Langkilde A, Mejer N, Andersen O, Eugen-Olsen J, Benfield T. Soluble  
45  
46 Urokinase Plasminogen Activator Receptor Is a Predictor of Incident Non-AIDS Comorbidity and  
47  
48 All-Cause Mortality in Human Immunodeficiency Virus Type 1 Infection. *J Infect Dis.*  
49  
50 2017;216(7):819-823.  
51  
52  
53  
54  
55 48. Hoenigl M, Raggam RB, Wagner J, et al. Diagnostic accuracy of soluble urokinase plasminogen  
56  
57



- 1  
2  
3 activator receptor (suPAR) for prediction of bacteremia in patients with systemic inflammatory  
4  
5  
6 response syndrome. *Clin Biochem.* 2013;46(3):225-229.  
7  
8  
9 49. Wittenhagen P, Kronborg G, Weis N, et al. The plasma level of soluble urokinase receptor is  
10  
11 elevated in patients with *Streptococcus pneumoniae* bacteraemia and predicts mortality. *Clin*  
12  
13 *Microbiol Infect.* 2004;10(5):409-415.  
14  
15  
16 50. Donadello K, Scolletta S, Taccone FS, et al. Soluble urokinase-type plasminogen activator  
17  
18 receptor as a prognostic biomarker in critically ill patients. *J Crit Care.* 2014;29(1):144-149.  
19  
20  
21 51. Koch A, Voigt S, Kruschinski C, et al. Circulating soluble urokinase plasminogen activator receptor  
22  
23 is stably elevated during the first week of treatment in the intensive care unit and predicts mortality  
24  
25 in critically ill patients. *Crit Care.* 2011;15(1):R63.  
26  
27  
28 52. Tzanakaki G, Paparoupa M, Kyprianou M, Barbouni A, Eugen-Olsen J, Kourea-Kremastinou J.  
29  
30 Elevated soluble urokinase receptor values in CSF, age and bacterial meningitis infection are  
31  
32 independent and additive risk factors of fatal outcome. *Eur J Clin Microbiol Infect Dis.*  
33  
34 2012;31(6):1157-1162.  
35  
36  
37 53. Østergaard C, Benfield T, Lundgren JD, Eugen-Olsen J. Soluble urokinase receptor is elevated in  
38  
39 cerebrospinal fluid from patients with purulent meningitis and is associated with fatal outcome.  
40  
41 *Scand J Infect Dis.* 2004;36(1):14-19.  
42  
43  
44 54. Wittenhagen P, Andersen JB, Hansen A, et al. Plasma soluble urokinase plasminogen activator  
45  
46 receptor in children with urinary tract infection. *Biomark Insights.* 2011;6:79-82.  
47  
48  
49  
50  
51  
52  
53  
54  
55  
56  
57  
58  
59  
60

- 1  
2  
3 55. Wrotek A, Jackowska T, Pawlik K. Soluble urokinase plasminogen activator receptor: an indicator  
4  
5  
6 of pneumonia severity in children. *Adv Exp Med Biol.* 2015;835:1-7.  
7  
8  
9 56. Savva A, Raftogiannis M, Baziaka F, et al. Soluble urokinase plasminogen activator receptor  
10  
11 (suPAR) for assessment of disease severity in ventilator-associated pneumonia and sepsis. *J*  
12  
13 *Infect.* 2011;63(5):344-350.  
14  
15  
16  
17 57. Rabna P, Andersen A, Wejse C, et al. Utility of the plasma level of suPAR in monitoring risk of  
18  
19 mortality during TB treatment. *PLoS One.* 2012;7(8):e43933.  
20  
21  
22  
23 58. Perch M, Kofoed P, Fischer TK, et al. Serum levels of soluble urokinase plasminogen activator  
24  
25 receptor is associated with parasitemia in children with acute Plasmodium falciparum malaria  
26  
27 infection. *Parasite Immunol.* 2004;26(5):207-211.  
28  
29  
30  
31  
32 59. Plewes K, Royakkers AA, Hanson J, et al. Correlation of biomarkers for parasite burden and  
33  
34 immune activation with acute kidney injury in severe falciparum malaria. *Malar J.* 2014;13:91.  
35  
36  
37  
38 60. Andersen O, Eugen-Olsen J, Kofoed K, Iversen J, Haugaard SB. Soluble Urokinase Plasminogen  
39  
40 Activator Receptor is a Marker of Dysmetabolism in HIV-Infected Patients Receiving Highly Active  
41  
42 Antiretroviral Therapy. *J Med Virol.* 2008;80(2):209-216.  
43  
44  
45  
46  
47 61. Rasmussen LJH, Moffitt TE, Arseneault L, et al. Association of Adverse Experiences and  
48  
49 Exposure to Violence in Childhood and Adolescence With Inflammatory Burden in Young People.  
50  
51  
52 *JAMA Pediatr.* 2019;Nov 4:1-11. doi:10.1001/jamapediatrics.2019.3875  
53  
54  
55  
56 62. Rasmussen LJH, Moffitt TE, Eugen-Olsen J, et al. Cumulative childhood risk is associated with a  
57  
58  
59  
60

- 1  
2  
3 new measure of chronic inflammation in adulthood. *J Child Psychol Psychiatry*. 2019;60(2):199-  
4  
5  
6 208.  
7  
8  
9 63. Riley RD, Moons KGM, Snell KIE, et al. A guide to systematic review and meta-analysis of  
10  
11 prognostic factor studies. *BMJ*. 2019;364:k4597.  
12  
13  
14  
15 64. Shamseer L, Moher D, Clarke M, et al. Preferred reporting items for systematic review and meta-  
16  
17 analysis protocols (PRISMA-P) 2015: Elaboration and explanation. *BMJ*. 2015;350:g7647.  
18  
19  
20  
21 65. Moher D, Shamseer L, Clarke M, et al. Preferred reporting items for systematic review and meta-  
22  
23 analysis protocols (PRISMA-P) 2015 statement. *Syst Rev*. 2015;4:1.  
24  
25  
26  
27 66. Moher D, Liberati A, Tetzlaff J, Altman DG, PRISMA Group. Preferred reporting items for  
28  
29 systematic reviews and meta-analyses: the PRISMA statement. *BMJ*. 2009;339:b2535.  
30  
31  
32  
33 67. Stroup DF, Berlin JA, Morton SC, et al. Meta-analysis of observational studies in epidemiology - a  
34  
35 proposal for reporting. Meta-analysis Of Observational Studies in Epidemiology (MOOSE) group.  
36  
37 *JAMA*. 2000;283(15):2008-2012.  
38  
39  
40  
41 68. Hayden JA, van der Windt DA, Cartwright JL, Côté P, Bombardier C. Assessing bias in studies of  
42  
43 prognostic factors. *Ann Intern Med*. 2013;158(4):280-286.  
44  
45  
46  
47 69. Hemingway H, Philipson P, Chen R, et al. Evaluating the quality of research into a single  
48  
49 prognostic biomarker: A systematic review and meta-analysis of 83 studies of C-reactive protein in  
50  
51 stable coronary artery disease. *PLoS Med*. 2010;7(6):e1000286.  
52  
53  
54  
55 70. Chêne G, Thompson SG. Methods for summarizing the risk associations of quantitative variables  
56  
57

- 1  
2  
3 in epidemiologic studies in a consistent form. *Am J Epidemiol.* 1996;144(6):610-621.  
4  
5  
6  
7 71. Guyatt GH, Oxman AD, Vist GE, et al. GRADE: An emerging consensus on rating quality of  
8  
9 evidence and strength of recommendations. *BMJ.* 2008;336(7650):924-926.  
10  
11  
12 72. Huguet A, Hayden JA, Stinson J, et al. Judging the quality of evidence in reviews of prognostic  
13  
14 factor research: Adapting the GRADE framework. *Syst Rev.* 2013;2:71.  
15  
16  
17  
18 73. Schultz M, Rasmussen LJH, Andersen MH, et al. Use of the prognostic biomarker suPAR in the  
19  
20 emergency department improves risk stratification but has no effect on mortality: a cluster-  
21  
22 randomized clinical trial (TRIAGE III). *Scand J Trauma Resusc Emerg Med.* 2018;26(1):69.  
23  
24  
25  
26  
27 74. Schultz M, Rasmussen LJH, Kallemose T, et al. Availability of suPAR in emergency departments  
28  
29 may improve risk stratification: A secondary analysis of the TRIAGE III trial. *Scand J Trauma*  
30  
31 *Resusc Emerg Med.* 2019;27(1):43.  
32  
33  
34  
35 75. Botha S, Fourie CM, Schutte R, Eugen-Olsen J, Pretorius R, Schutte AE. Soluble urokinase  
36  
37 plasminogen activator receptor as a prognostic marker of all-cause and cardiovascular mortality in  
38  
39 a black population. *Int J Cardiol.* 2015;184:631-636.  
40  
41  
42  
43  
44 76. Hayek SS, Sever S, Ko YA, et al. Soluble Urokinase Receptor and Chronic Kidney Disease. *N*  
45  
46 *Engl J Med.* 2015;373(20):1916-1925.  
47  
48  
49  
50 77. Wei C, El Hindi S, Li J, et al. Circulating urokinase receptor as a cause of focal segmental  
51  
52 glomerulosclerosis. *Nat Med.* 2011;17(8):952-960.  
53  
54  
55  
56  
57  
58  
59  
60

| <b>Table 1. QUIPS Risk of Bias Assessment Instrument for Prognostic Factor (PF) Studies</b> |                                                                                                                                                                                                                                                                                                                      |
|---------------------------------------------------------------------------------------------|----------------------------------------------------------------------------------------------------------------------------------------------------------------------------------------------------------------------------------------------------------------------------------------------------------------------|
| <b>Biases</b>                                                                               | <b>Issues to consider for judging overall rating of "Risk of bias"</b>                                                                                                                                                                                                                                               |
| Instructions to assess the risk of each potential bias:                                     | These issues will guide your thinking and judgment about the overall risk of bias within each of the 6 domains. Some 'issues' may not be relevant to the specific study or the review research question. These issues are taken together to inform the overall judgment of potential bias for each of the 6 domains. |
| <b>1. Study Participation</b>                                                               | <b>Goal: To judge the risk of selection bias (likelihood that relationship between <i>PF</i> and <i>outcome</i> is different for participants and eligible non-participants).</b>                                                                                                                                    |
| <i>Source of target population</i>                                                          | The source population or population of interest is adequately described for key characteristics.                                                                                                                                                                                                                     |
| <i>Method used to identify population</i>                                                   | The sampling frame and recruitment are adequately described, including methods to identify the sample sufficient to limit potential bias (number and type used, e.g., referral patterns in health care)                                                                                                              |
| <i>Recruitment period</i>                                                                   | Period of recruitment is adequately described                                                                                                                                                                                                                                                                        |
| <i>Place of recruitment</i>                                                                 | Place of recruitment (setting and geographic location) are adequately described                                                                                                                                                                                                                                      |
| <i>Inclusion and exclusion criteria</i>                                                     | Inclusion and exclusion criteria are adequately described (e.g., including explicit diagnostic criteria or "zero time" description).                                                                                                                                                                                 |
| <i>Adequate study participation</i>                                                         | There is adequate participation in the study by eligible individuals                                                                                                                                                                                                                                                 |
| <i>Baseline characteristics</i>                                                             | The baseline study sample (i.e., individuals entering the study) is adequately described for key characteristics.                                                                                                                                                                                                    |
| Study participation Summary                                                                 | The study sample represents the population of interest on key characteristics, sufficient to limit potential bias of the observed relationship between PF and outcome.                                                                                                                                               |
| <b>2. Study Attrition</b>                                                                   | <b>Goal: To judge the risk of attrition bias (likelihood that relationship between <i>PF</i> and <i>outcome</i> are different for completing and non-completing participants).</b>                                                                                                                                   |

|                                                                             |                                                                                                                                                                                                                                                                  |
|-----------------------------------------------------------------------------|------------------------------------------------------------------------------------------------------------------------------------------------------------------------------------------------------------------------------------------------------------------|
| <i>Proportion of baseline sample available for analysis</i>                 | Response rate (i.e., proportion of study sample completing the study and providing outcome data) is adequate.                                                                                                                                                    |
| <i>Attempts to collect information on participants who dropped out</i>      | Attempts to collect information on participants who dropped out of the study are described.                                                                                                                                                                      |
| <i>Reasons and potential impact of subjects lost to follow-up</i>           | Reasons for loss to follow-up are provided.                                                                                                                                                                                                                      |
| <i>Outcome and prognostic factor information on those lost to follow-up</i> | Participants lost to follow-up are adequately described for key characteristics.                                                                                                                                                                                 |
|                                                                             | There are no important differences between key characteristics and outcomes in participants who completed the study and those who did not.                                                                                                                       |
| Study Attrition Summary                                                     | Loss to follow-up (from baseline sample to study population analyzed) is not associated with key characteristics (i.e., the study data adequately represent the sample) sufficient to limit potential bias to the observed relationship between PF and outcome.  |
| <b>3. Prognostic Factor Measurement</b>                                     | <b>Goal: To judge the risk of measurement bias related to how PF was measured (differential measurement of PF related to the level of outcome).</b>                                                                                                              |
| <i>Definition of the PF</i>                                                 | A clear definition or description of 'PF' is provided (e.g., including dose, level, duration of exposure, and clear specification of the method of measurement).                                                                                                 |
| <i>Valid and Reliable Measurement of PF</i>                                 | Method of PF measurement is adequately valid and reliable to limit misclassification bias (e.g., may include relevant outside sources of information on measurement properties, also characteristics, such as blind measurement and limited reliance on recall). |
|                                                                             | Continuous variables are reported or appropriate cut-points (i.e., not data-dependent) are used.                                                                                                                                                                 |
| <i>Method and Setting of PF Measurement</i>                                 | The method and setting of measurement of PF is the same for all study participants.                                                                                                                                                                              |
| <i>Proportion of data on PF available for analysis</i>                      | Adequate proportion of the study sample has complete data for PF variable.                                                                                                                                                                                       |

|                                                      |                                                                                                                                                                                                                                                                                                          |
|------------------------------------------------------|----------------------------------------------------------------------------------------------------------------------------------------------------------------------------------------------------------------------------------------------------------------------------------------------------------|
| <i>Method used for missing data</i>                  | Appropriate methods of imputation are used for missing 'PF' data.                                                                                                                                                                                                                                        |
| PF Measurement Summary                               | <i>PF</i> is adequately measured in study participants to sufficiently limit potential bias.                                                                                                                                                                                                             |
| <b>4. Outcome Measurement</b>                        | <b>Goal: To judge the risk of bias related to the measurement of outcome (differential measurement of outcome related to the baseline level of PF).</b>                                                                                                                                                  |
| <i>Definition of the Outcome</i>                     | A clear definition of outcome is provided, including duration of follow-up and level and extent of the outcome construct.                                                                                                                                                                                |
| <i>Valid and Reliable Measurement of Outcome</i>     | The method of outcome measurement used is adequately valid and reliable to limit misclassification bias (e.g., may include relevant outside sources of information on measurement properties, also characteristics, such as blind measurement and confirmation of outcome with valid and reliable test). |
| <i>Method and Setting of Outcome Measurement</i>     | The method and setting of outcome measurement is the same for all study participants.                                                                                                                                                                                                                    |
| Outcome Measurement Summary                          | <i>Outcome of interest</i> is adequately measured in study participants to sufficiently limit potential bias.                                                                                                                                                                                            |
| <b>5. Study Confounding</b>                          | <b>Goal: To judge the risk of bias due to confounding (i.e. the effect of PF is distorted by another factor that is related to PF and outcome).</b>                                                                                                                                                      |
| <i>Important Confounders Measured</i>                | All important confounders, including treatments (key variables in conceptual model), are measured.                                                                                                                                                                                                       |
| <i>Definition of the confounding factor</i>          | Clear definitions of the important confounders measured are provided (e.g., including dose, level, and duration of exposures).                                                                                                                                                                           |
| <i>Valid and Reliable Measurement of Confounders</i> | Measurement of all important confounders is adequately valid and reliable (e.g., may include relevant outside sources of information on measurement properties, also characteristics, such as blind measurement and limited reliance on recall).                                                         |
| <i>Method and Setting of Confounding Measurement</i> | The method and setting of confounding measurement are the same for all study participants.                                                                                                                                                                                                               |
| <i>Method used for missing data</i>                  | Appropriate methods are used if imputation is used for missing confounder data.                                                                                                                                                                                                                          |

|                                                                                                                                                                              |                                                                                                                                                                                                                                    |
|------------------------------------------------------------------------------------------------------------------------------------------------------------------------------|------------------------------------------------------------------------------------------------------------------------------------------------------------------------------------------------------------------------------------|
| <i>Appropriate Accounting for Confounding</i>                                                                                                                                | Important potential confounders are accounted for in the study design (e.g., matching for key variables, stratification, or initial assembly of comparable groups).                                                                |
|                                                                                                                                                                              | Important potential confounders are accounted for in the analysis (i.e., appropriate adjustment).                                                                                                                                  |
| Study Confounding Summary                                                                                                                                                    | Important potential confounders are appropriately accounted for, limiting potential bias with respect to the relationship between <i>PF</i> and <i>outcome</i> .                                                                   |
| <b>6. Statistical Analysis and Reporting</b>                                                                                                                                 | <b>Goal: To judge the risk of bias related to the statistical analysis and presentation of results.</b>                                                                                                                            |
| <i>Presentation of analytical strategy</i>                                                                                                                                   | There is sufficient presentation of data to assess the adequacy of the analysis.                                                                                                                                                   |
| <i>Model development strategy</i>                                                                                                                                            | The strategy for model building (i.e., inclusion of variables in the statistical model) is appropriate and is based on a conceptual framework or model.<br>The selected statistical model is adequate for the design of the study. |
| <i>Reporting of results</i>                                                                                                                                                  | There is no selective reporting of results.                                                                                                                                                                                        |
| Statistical Analysis and Reporting Summary                                                                                                                                   | The statistical analysis is appropriate for the design of the study, limiting potential for presentation of invalid or spurious results.                                                                                           |
| Modified from: Hayden JA, Côté P, Bombardier C. Evaluation of the Quality of Prognosis Studies in Systematic Reviews. <i>Annals of Internal Medicine</i> . 2006;144:427-437. |                                                                                                                                                                                                                                    |



## Appendix 1. Example of planned PubMed search.

| Search | Query                                                                                                                                                                                                                                                                                                                                                                                                                                                                                                                                                                          |
|--------|--------------------------------------------------------------------------------------------------------------------------------------------------------------------------------------------------------------------------------------------------------------------------------------------------------------------------------------------------------------------------------------------------------------------------------------------------------------------------------------------------------------------------------------------------------------------------------|
| #1     | "Receptors, Urokinase Plasminogen Activator"[Mesh] OR "Soluble urokinase plasminogen activator receptor"[tiab] OR "Soluble urokinase plasminogen activator receptors"[tiab] OR "soluble urokinase-type plasminogen activator receptor"[tiab] OR "soluble urokinase-type plasminogen activator receptors"[tiab] OR "soluble urokinase receptor"[tiab] OR "soluble urokinase receptors"[tiab] OR "plasminogen activator receptor"[tiab] OR "plasminogen activator receptors"[tiab] OR suPAR[tiab] OR uPAR[tiab]                                                                  |
| #2     | "Mortality"[Mesh] OR mortality[tiab] OR mortalities[tiab] OR "death"[Mesh] OR death[tiab] OR deaths[tiab] OR fatality[tiab] OR fatalities[tiab] OR "fatal outcome"[tiab] OR "fatal outcomes"[tiab] OR "prognosis"[Mesh] OR prognosis[tiab] OR prognostic[tiab] OR "survival"[Mesh] OR "survival analysis"[Mesh] OR "survival rate"[Mesh] OR survival[tiab] OR "life expectancy"[Mesh] OR "life expectancy"[tiab] OR "hazard ratio"[tiab] OR "hazard ratios"[tiab] OR "risk assessment"[Mesh] OR risk[tiab] OR "severity of illness index"[Mesh] OR "severity of illness"[tiab] |
| #3     | #1 AND #2                                                                                                                                                                                                                                                                                                                                                                                                                                                                                                                                                                      |
| #4     | #3 NOT ("animals"[mh] NOT "humans"[mh])                                                                                                                                                                                                                                                                                                                                                                                                                                                                                                                                        |
| #5     | #4 NOT (case reports[ptyp] OR editorial[ptyp] OR comment[ptyp])                                                                                                                                                                                                                                                                                                                                                                                                                                                                                                                |

### Full PubMed search term:

(((((("Receptors, Urokinase Plasminogen Activator"[Mesh] OR "Soluble urokinase plasminogen activator receptor"[tiab] OR "Soluble urokinase plasminogen activator receptors"[tiab] OR "soluble urokinase-type plasminogen activator receptor"[tiab] OR "soluble urokinase-type plasminogen activator receptors"[tiab] OR "soluble urokinase receptor"[tiab] OR "soluble urokinase receptors"[tiab] OR "plasminogen activator receptor"[tiab] OR "plasminogen activator receptors"[tiab] OR suPAR[tiab] OR uPAR[tiab])) AND (("Mortality"[Mesh] OR mortality[tiab] OR mortalities[tiab] OR "death"[Mesh] OR death[tiab] OR deaths[tiab] OR fatality[tiab] OR fatalities[tiab] OR "fatal outcome"[tiab] OR "fatal outcomes"[tiab] OR "prognosis"[Mesh] OR prognosis[tiab] OR prognostic[tiab] OR "survival"[Mesh] OR "survival analysis"[Mesh] OR

1  
2  
3 "survival rate"[Mesh] OR survival[tiab] OR "life expectancy"[Mesh] OR "life expectancy"[tiab] OR  
4 "hazard ratio"[tiab] OR "hazard ratios"[tiab] OR "risk assessment"[Mesh] OR risk[tiab] OR  
5 "severity of illness index"[Mesh] OR "severity of illness"[tiab]))) NOT ("animals"[mh] NOT  
6 "humans"[mh])) NOT (case reports[ptyp] OR editorial[ptyp] OR comment[ptyp])  
7  
8  
9  
10  
11  
12  
13  
14  
15  
16  
17  
18  
19  
20  
21  
22  
23  
24  
25  
26  
27  
28  
29  
30  
31  
32  
33  
34  
35  
36  
37  
38  
39  
40  
41  
42  
43  
44  
45  
46  
47  
48  
49  
50  
51  
52  
53  
54  
55  
56  
57  
58  
59  
60

**PRISMA-P (Preferred Reporting Items for Systematic review and Meta-Analysis Protocols) 2015 checklist: recommended items to address in a systematic review protocol\***

| Section and topic                 | Item No | Checklist item                                                                                                                                                                                                                                                                                                                                                                                                                                                                                                                                                           |
|-----------------------------------|---------|--------------------------------------------------------------------------------------------------------------------------------------------------------------------------------------------------------------------------------------------------------------------------------------------------------------------------------------------------------------------------------------------------------------------------------------------------------------------------------------------------------------------------------------------------------------------------|
| <b>ADMINISTRATIVE INFORMATION</b> |         |                                                                                                                                                                                                                                                                                                                                                                                                                                                                                                                                                                          |
| Title:                            |         |                                                                                                                                                                                                                                                                                                                                                                                                                                                                                                                                                                          |
| Identification                    | 1a      | Identify the report as a protocol of a systematic review. <b>Included in title, p. 1.</b>                                                                                                                                                                                                                                                                                                                                                                                                                                                                                |
| Update                            | 1b      | If the protocol is for an update of a previous systematic review, identify as such. <b>N/A</b>                                                                                                                                                                                                                                                                                                                                                                                                                                                                           |
| Registration                      | 2       | If registered, provide the name of the registry (such as PROSPERO) and registration number. <b>See p. 2-3; the protocol will be registered at PROSPERO, however, PROSPERO has the following recommendation: "Ensure that your review protocol is in its (near) final form and that no major changes are anticipated at this stage - e.g. if your protocol will be peer reviewed it will usually be sensible to wait until this is complete before registering". Therefore, we will wait with the registration at PROSPERO until the protocol has been peer-reviewed.</b> |
| Authors:                          |         |                                                                                                                                                                                                                                                                                                                                                                                                                                                                                                                                                                          |
| Contact                           | 3a      | Provide name, institutional affiliation, e-mail address of all protocol authors; provide physical mailing address of corresponding author. <b>p. 1-2.</b>                                                                                                                                                                                                                                                                                                                                                                                                                |
| Contributions                     | 3b      | Describe contributions of protocol authors and identify the guarantor of the review. <b>p. 4.</b>                                                                                                                                                                                                                                                                                                                                                                                                                                                                        |
| Amendments                        | 4       | If the protocol represents an amendment of a previously completed or published protocol, identify as such and list changes; otherwise, state plan for documenting important protocol amendments. <b>The plan for documenting protocol amendments is presented on p. 4.</b>                                                                                                                                                                                                                                                                                               |
| Support:                          |         |                                                                                                                                                                                                                                                                                                                                                                                                                                                                                                                                                                          |
| Sources                           | 5a      | Indicate sources of financial or other support for the review. <b>p. 4-5.</b>                                                                                                                                                                                                                                                                                                                                                                                                                                                                                            |
| Sponsor                           | 5b      | Provide name for the review funder and/or sponsor. <b>p. 4-5.</b>                                                                                                                                                                                                                                                                                                                                                                                                                                                                                                        |
| Role of sponsor or funder         | 5c      | Describe roles of funder(s), sponsor(s), and/or institution(s), if any, in developing the protocol. <b>p. 4-5.</b>                                                                                                                                                                                                                                                                                                                                                                                                                                                       |
| <b>INTRODUCTION</b>               |         |                                                                                                                                                                                                                                                                                                                                                                                                                                                                                                                                                                          |
| Rationale                         | 6       | Describe the rationale for the review in the context of what is already known. <b>p. 8-10.</b>                                                                                                                                                                                                                                                                                                                                                                                                                                                                           |
| Objectives                        | 7       | Provide an explicit statement of the question(s) the review will address with reference to participants, interventions, comparators, and outcomes (PICO). <b>p. 10-11.</b>                                                                                                                                                                                                                                                                                                                                                                                               |
| <b>METHODS</b>                    |         |                                                                                                                                                                                                                                                                                                                                                                                                                                                                                                                                                                          |
| Eligibility criteria              | 8       | Specify the study characteristics (such as PICO, study design, setting, time frame) and report characteristics (such as years considered, language, publication status) to be used as criteria for eligibility for the review. <b>p. 12-14.</b>                                                                                                                                                                                                                                                                                                                          |
| Information sources               | 9       | Describe all intended information sources (such as electronic databases, contact with study authors, trial registers or other grey literature sources) with planned dates of coverage. <b>p. 14-15.</b>                                                                                                                                                                                                                                                                                                                                                                  |

|                                    |     |                                                                                                                                                                                                                                                                             |
|------------------------------------|-----|-----------------------------------------------------------------------------------------------------------------------------------------------------------------------------------------------------------------------------------------------------------------------------|
| Search strategy                    | 10  | Present draft of search strategy to be used for at least one electronic database, including planned limits, such that it could be repeated. <a href="#">p. 15-16 + Appendix 1.</a>                                                                                          |
| Study records:                     |     |                                                                                                                                                                                                                                                                             |
| Data management                    | 11a | Describe the mechanism(s) that will be used to manage records and data throughout the review. <a href="#">p. 16.</a>                                                                                                                                                        |
| Selection process                  | 11b | State the process that will be used for selecting studies (such as two independent reviewers) through each phase of the review (that is, screening, eligibility and inclusion in meta-analysis). <a href="#">p. 16-17.</a>                                                  |
| Data collection process            | 11c | Describe planned method of extracting data from reports (such as piloting forms, done independently, in duplicate), any processes for obtaining and confirming data from investigators. <a href="#">p. 17-18.</a>                                                           |
| Data items                         | 12  | List and define all variables for which data will be sought (such as PICO items, funding sources), any pre-planned data assumptions and simplifications. <a href="#">p. 18-19.</a>                                                                                          |
| Outcomes and prioritization        | 13  | List and define all outcomes for which data will be sought, including prioritization of main and additional outcomes, with rationale. <a href="#">p. 19-20.</a>                                                                                                             |
| Risk of bias in individual studies | 14  | Describe anticipated methods for assessing risk of bias of individual studies, including whether this will be done at the outcome or study level, or both; state how this information will be used in data synthesis. <a href="#">p. 21-22.</a>                             |
| Data synthesis                     | 15a | Describe criteria under which study data will be quantitatively synthesised. <a href="#">p. 22-23</a>                                                                                                                                                                       |
|                                    | 15b | If data are appropriate for quantitative synthesis, describe planned summary measures, methods of handling data and methods of combining data from studies, including any planned exploration of consistency (such as $I^2$ , Kendall's $\tau$ ). <a href="#">p. 22-24.</a> |
|                                    | 15c | Describe any proposed additional analyses (such as sensitivity or subgroup analyses, meta-regression). <a href="#">p. 24-26.</a>                                                                                                                                            |
|                                    | 15d | If quantitative synthesis is not appropriate, describe the type of summary planned. <a href="#">p. 23.</a>                                                                                                                                                                  |
| Meta-bias(es)                      | 16  | Specify any planned assessment of meta-bias(es) (such as publication bias across studies, selective reporting within studies). <a href="#">p. 26.</a>                                                                                                                       |
| Confidence in cumulative evidence  | 17  | Describe how the strength of the body of evidence will be assessed (such as GRADE). <a href="#">p. 26-27.</a>                                                                                                                                                               |

**\* It is strongly recommended that this checklist be read in conjunction with the PRISMA-P Explanation and Elaboration (cite when available) for important clarification on the items. Amendments to a review protocol should be tracked and dated. The copyright for PRISMA-P (including checklist) is held by the PRISMA-P Group and is distributed under a Creative Commons Attribution Licence 4.0.**

*From: Shamseer L, Moher D, Clarke M, Ghersi D, Liberati A, Petticrew M, Shekelle P, Stewart L, PRISMA-P Group. Preferred reporting items for systematic review and meta-analysis protocols (PRISMA-P) 2015: elaboration and explanation. *BMJ*. 2015 Jan 2;349(jan02 1):g7647.*

# BMJ Open

## **Soluble urokinase plasminogen activator receptor (suPAR) as a prognostic marker of mortality in healthy, general, and patient populations: protocol for a systematic review and meta-analysis**

|                                 |                                                                                                                                                                                                                                                                                                                                                                                                                                                                                                                                                                                                                                      |
|---------------------------------|--------------------------------------------------------------------------------------------------------------------------------------------------------------------------------------------------------------------------------------------------------------------------------------------------------------------------------------------------------------------------------------------------------------------------------------------------------------------------------------------------------------------------------------------------------------------------------------------------------------------------------------|
| Journal:                        | <i>BMJ Open</i>                                                                                                                                                                                                                                                                                                                                                                                                                                                                                                                                                                                                                      |
| Manuscript ID                   | bmjopen-2019-036125.R1                                                                                                                                                                                                                                                                                                                                                                                                                                                                                                                                                                                                               |
| Article Type:                   | Protocol                                                                                                                                                                                                                                                                                                                                                                                                                                                                                                                                                                                                                             |
| Date Submitted by the Author:   | 11-Feb-2020                                                                                                                                                                                                                                                                                                                                                                                                                                                                                                                                                                                                                          |
| Complete List of Authors:       | Petersen, Jens Emil; Duke University, Department of Infectious Diseases Kallemose, Thomas; Copenhagen University Hospital Hvidovre, Clinical Research Centre 056<br>Barton, Karen; Duke University, Duke University Medical Center Library & Archives<br>Caspi, A; Duke University, Department of Psychology and Neuroscience; King's College London, Social, Genetic, and Developmental Psychiatry Centre, Institute of Psychiatry, Psychology, and Neuroscience<br>Rasmussen, Line Jee Hartmann; Duke University, Department of Psychology and Neuroscience; Copenhagen University Hospital Hvidovre, Clinical Research Centre 056 |
| <b>Primary Subject Heading</b>: | Public health                                                                                                                                                                                                                                                                                                                                                                                                                                                                                                                                                                                                                        |
| Secondary Subject Heading:      | Epidemiology, Immunology (including allergy)                                                                                                                                                                                                                                                                                                                                                                                                                                                                                                                                                                                         |
| Keywords:                       | Clinical chemistry < PATHOLOGY, PREVENTIVE MEDICINE, PUBLIC HEALTH, STATISTICS & RESEARCH METHODS, EPIDEMIOLOGY, IMMUNOLOGY                                                                                                                                                                                                                                                                                                                                                                                                                                                                                                          |
|                                 |                                                                                                                                                                                                                                                                                                                                                                                                                                                                                                                                                                                                                                      |

SCHOLARONE™  
Manuscripts



I, the Submitting Author has the right to grant and does grant on behalf of all authors of the Work (as defined in the below author licence), an exclusive licence and/or a non-exclusive licence for contributions from authors who are: i) UK Crown employees; ii) where BMJ has agreed a CC-BY licence shall apply, and/or iii) in accordance with the terms applicable for US Federal Government officers or employees acting as part of their official duties; on a worldwide, perpetual, irrevocable, royalty-free basis to BMJ Publishing Group Ltd ("BMJ") its licensees and where the relevant Journal is co-owned by BMJ to the co-owners of the Journal, to publish the Work in this journal and any other BMJ products and to exploit all rights, as set out in our [licence](#).

The Submitting Author accepts and understands that any supply made under these terms is made by BMJ to the Submitting Author unless you are acting as an employee on behalf of your employer or a postgraduate student of an affiliated institution which is paying any applicable article publishing charge ("APC") for Open Access articles. Where the Submitting Author wishes to make the Work available on an Open Access basis (and intends to pay the relevant APC), the terms of reuse of such Open Access shall be governed by a Creative Commons licence – details of these licences and which [Creative Commons](#) licence will apply to this Work are set out in our licence referred to above.

Other than as permitted in any relevant BMJ Author's Self Archiving Policies, I confirm this Work has not been accepted for publication elsewhere, is not being considered for publication elsewhere and does not duplicate material already published. I confirm all authors consent to publication of this Work and authorise the granting of this licence.

1  
2  
3 **Soluble urokinase plasminogen activator receptor (suPAR) as a prognostic marker of**  
4  
5  
6  
7 **mortality in healthy, general, and patient populations: protocol for a systematic review**  
8  
9  
10 **and meta-analysis**  
11  
12  
13

14 **Authors:**

15  
16  
17  
18 Jens Emil Vang Petersen,<sup>1</sup> Thomas Kalleose,<sup>2</sup> Karen D. Barton,<sup>3</sup> Avshalom Caspi,<sup>4,5,6,7</sup> Line

19  
20  
21 Jee Hartmann Rasmussen<sup>2,4</sup>  
22  
23

24  
25 <sup>1</sup>Department of Infectious Diseases, Duke University, Durham, NC, USA  
26  
27

28 <sup>2</sup>Clinical Research Centre, Copenhagen University Hospital Amager and Hvidovre, Hvidovre,  
29  
30  
31 Denmark  
32  
33

34  
35 <sup>3</sup>Duke University Medical Center Library & Archives, Duke University, Durham, NC, USA  
36  
37

38 <sup>4</sup>Department of Psychology and Neuroscience, Duke University, Durham, NC, USA  
39  
40

41 <sup>5</sup>Department of Psychiatry and Behavioral Sciences, Duke University School of Medicine,  
42  
43  
44 Durham, NC, USA  
45  
46

47 <sup>6</sup>Center for Genomic and Computational Biology, Duke University, Durham, NC, USA  
48  
49

50  
51 <sup>7</sup>Social, Genetic, and Developmental Psychiatry Centre, Institute of Psychiatry, Psychology, and  
52  
53  
54 Neuroscience, King's College London, London, UK  
55  
56

1  
2  
3 E-mail: Jens E V Petersen [jensemilvang.petersen@duke.edu](mailto:jensemilvang.petersen@duke.edu) – Thomas Kallelose

4  
5  
6 [thomas.kallelose@regionh.dk](mailto:thomas.kallelose@regionh.dk) – Karen Barton [karen.d.barton@duke.edu](mailto:karen.d.barton@duke.edu) – Avshalom Caspi

7  
8  
9 [avshalom.caspi@duke.edu](mailto:avshalom.caspi@duke.edu) – Line J H Rasmussen [line.jee.hartmann.rasmussen@duke.edu](mailto:line.jee.hartmann.rasmussen@duke.edu)

10  
11  
12  
13 **Corresponding author:**

14  
15  
16 Line Jee Hartmann Rasmussen

17  
18  
19 Dept. of Psychology and Neuroscience

20  
21  
22 2020 W Main St, Suite 201

23  
24  
25  
26  
27 Durham, NC 27705, USA

28  
29  
30  
31 Clinical Research Centre

32  
33  
34 Hvidovre Hospital

35  
36  
37 Kettegård Allé 30

38  
39  
40 DK-2650 Hvidovre, Denmark

41  
42  
43  
44 **Word count: 4,224**



**Contributions:**

JEVP and LJHR are the guarantors of the review. All authors (JEVP, TK, KDB, AC, LJHR) contributed to the development of the selection criteria, the risk of bias assessment strategy, and data extraction criteria. LJHR and JEVV conceived the study. JEVV, KDB, and LJHR developed the search strategy. TK provided statistical expertise. JEVV and LJHR drafted the protocol. All authors (JEVP, TK, KDB, AC, LJHR) read, provided feedback, and approved the final protocol.

**Amendments:**

In the event of protocol amendments, the date of each amendment will be accompanied by a description of the change and the rationale for the change in this section. An updated protocol will be identified with a new version number and a list of the specific amendments that were made to the previous version, in accordance with the Preferred Reporting Items for Systematic review and Meta-Analysis Protocols (PRISMA-P) guidelines.

**Funding statement:**

This research received no specific grant from any funding agency in the public, commercial, or not-for-profit sectors. JEVV is supported by an international postdoc fellowship from the Alfred

1  
2  
3 Benzon Foundation (grant no. ABF-2018-91). LJHR is supported by an international postdoc  
4  
5  
6 fellowship from the Lundbeck Foundation (grant no. R288-2018-380). The funders had no role  
7  
8  
9 in designing the project or developing the protocol, neither will they have any role in the review  
10  
11  
12  
13 conduct, data analysis and interpretation, or publication of the study results.  
14  
15

16  
17 **Competing interests:**

18  
19  
20 LJHR has received funding for travel outside the submitted work from ViroGates A/S. The  
21  
22  
23  
24 remaining authors report no conflicts of interest.  
25  
26  
27  
28  
29  
30  
31  
32  
33  
34  
35  
36  
37  
38  
39  
40  
41  
42  
43  
44  
45  
46  
47  
48  
49  
50  
51  
52  
53  
54  
55  
56  
57  
58  
59  
60

## ABSTRACT

**Introduction:** Chronic inflammation is increasingly recognized as a major contributor to disease, disability, and ultimately death, but measuring the levels of chronic inflammation remains non-canonized, making it difficult to relate chronic inflammation and mortality. *Soluble urokinase plasminogen activator receptor* (suPAR), an emerging biomarker of chronic inflammation, has been proposed as a prognostic biomarker associated with future incidence of chronic disease and mortality in general as well as patient populations. Proper prognostic biomarkers are important as they can help improve risk stratification in clinical settings and provide guidance in treatment or lifestyle decisions as well as in the design of randomized trials. Here, we wish to summarize the evidence about the overall association of the biomarker suPAR with mortality in healthy, general, and patient populations across diseases.

**Methods and analysis:** The search will be conducted using Medline, Embase, and Scopus databases from their inception through 28 February 2020 to identify studies investigating “suPAR” and “mortality”. Observational studies and control groups from intervention studies written in English or Danish will be included. The “Quality In Prognosis Studies” tool will be used to assess the risk of bias for the studies included. Unadjusted and adjusted mortality outcome

1  
2  
3 measures (e.g., risk ratios, odds ratios, hazard ratios) with 95% CIs will be extracted for healthy  
4  
5  
6 individuals, general and patient populations. The primary outcome is all-cause mortality within  
7  
8  
9 any given follow-up. Subgroup analyses will be performed based on time of outcome, cause of  
10  
11  
12 death, population type, adjustments for conventional risk factors and inflammation markers, etc.  
13  
14  
15

16  
17 **Ethics and dissemination:** This systematic review will synthesize evidence on the use of suPAR  
18  
19 as a prognostic marker for mortality. The results will be disseminated by publication in a peer-  
20  
21  
22 reviewed journal. Data used will be obtained from published studies, and ethics approval is  
23  
24  
25 therefore not necessary for this systematic review.  
26  
27  
28  
29

### 30 **STRENGTHS AND LIMITATIONS OF THIS STUDY**

- 31  
32
- 33 - To the best of our knowledge, this is the first systematic review and meta-analysis that  
34  
35 investigates the association between suPAR and mortality across general and patient  
36  
37 populations.  
38  
39
  - 40 - This review will provide valuable new knowledge for researchers studying chronic  
41  
42 inflammation's effect on both short- and long-term health, and for clinicians using suPAR  
43  
44 in clinical settings to stratify patients.  
45  
46  
47
  - 48 - Study selection, data extraction, and quality assessment will be performed  
49  
50  
51 independently by two reviewers.  
52  
53  
54  
55  
56  
57

- 1  
2  
3  
4 - The results will be discussed in context with other studies in the field.  
5  
6  
7 - Common to most meta-analyses, significant heterogeneity may exist, which will be  
8  
9  
10 investigated thoroughly with subgroup analyses and meta-regressions.  
11  
12  
13  
14  
15  
16  
17  
18  
19  
20  
21  
22  
23  
24  
25  
26  
27  
28  
29  
30  
31  
32  
33  
34  
35  
36  
37  
38  
39  
40  
41  
42  
43  
44  
45  
46  
47  
48  
49  
50  
51  
52  
53  
54  
55  
56  
57  
58  
59  
60
- The results will be discussed in context with other studies in the field.
  - Common to most meta-analyses, significant heterogeneity may exist, which will be investigated thoroughly with subgroup analyses and meta-regressions.

For peer review only

## INTRODUCTION

### Rationale:

Chronic inflammation is increasingly recognized as a major contributor to disease, disability, and ultimately death in industrialized and developing countries alike.<sup>1-4</sup> Chronic inflammation is related to multiple genetic and lifestyle factors, but measuring the levels of chronic inflammation remains non-canonized, making it difficult to relate chronic inflammation and death. *Soluble urokinase plasminogen activator receptor* (suPAR) is a protein present in the blood, and its concentration is thought to reflect a person's level of chronic inflammation and immune activation.<sup>5,6</sup> Thus, elevated suPAR is proposed as a prognostic biomarker associated with future incidence of chronic disease and mortality in general as well as patient populations,<sup>7,8</sup> including previous systematic reviews and meta-analyses showing suPAR to be elevated in focal segmental glomerulosclerosis<sup>9,10</sup> or to be associated with mortality in patients with bacterial infections and sepsis.<sup>11-14</sup> While healthy persons generally have a low level of suPAR in the blood,<sup>15</sup> the blood concentration of suPAR is increased in a wide range of diseases: acute and chronic, non-communicable and infectious, i.e., suPAR has been shown to be elevated in cardiovascular diseases (stroke, ischemic heart disease, venous thromboembolism, incident

1  
2  
3 atrial fibrillation),<sup>16–18</sup> type 1 and type 2 diabetes,<sup>19–21</sup> various types of cancer,<sup>22–36</sup> rheumatic  
4  
5  
6 disease,<sup>37,38</sup> chronic pulmonary disease,<sup>39</sup> chronic liver disease (non-alcoholic fatty liver  
7  
8  
9 disease, cirrhosis),<sup>40–42</sup> chronic kidney disease<sup>43,44</sup> as well as infectious diseases caused by  
10  
11  
12 viruses<sup>42,45–47</sup>, bacteria<sup>48–57</sup>, and parasites<sup>58,59</sup>. Together, these studies highlight the broad  
13  
14  
15  
16 associations across patient groups and etiologies—and even in general populations—between  
17  
18  
19 elevated blood levels of suPAR with general health, disease outcome, complications, and  
20  
21  
22  
23 mortality.

24  
25  
26 In contrast to common inflammatory biomarkers, such as the current gold standard C-reactive  
27  
28  
29 protein (CRP), suPAR is not an acute-phase reactant, and suPAR levels in the blood are less  
30  
31  
32 rapidly affected by acute changes and short-term influences.<sup>17,60</sup> Additionally suPAR was more  
33  
34  
35  
36 reliably associated with early-life risk factors such as adverse childhood experiences, early-life  
37  
38  
39 stress, and violence than CRP and interleukin-6 (IL-6), potentially because these more  
40  
41  
42 traditional biomarkers of inflammation as acute-phase reactants mix historical and acute  
43  
44  
45 effects.<sup>61,62</sup> This, along with its non-specific associations with pathologies in general, suggests  
46  
47  
48  
49 that suPAR blood levels are an appropriate readout for chronic inflammation.

1  
2  
3 Prognostic biomarkers are important as they can help improve risk stratification in clinical  
4  
5  
6 settings or provide guidance in treatment or lifestyle decisions as well as in the design of  
7  
8  
9 randomized trials.<sup>63</sup> Here, we wish to summarize the evidence about the overall association of  
10  
11  
12 the biomarker suPAR with mortality in healthy, general, and patient populations and across  
13  
14  
15 diseases. As suPAR is still a relatively new clinical biomarker, clinical guidelines and cut-offs are  
16  
17  
18 still lacking. Our findings will clarify the association between suPAR and mortality, and what  
19  
20  
21 value a biomarker reflecting chronic inflammation adds, compared to the current standard  
22  
23  
24 inflammatory biomarkers. The study will help development of future clinical guidelines, based on  
25  
26  
27 a better understanding of differences in the prognostic value of suPAR between and across  
28  
29  
30 healthy individuals and patient subgroups, which is critical in clinical decision-making. Having an  
31  
32  
33 established accurate chronic inflammation biomarker with a well-described association with  
34  
35  
36 mortality is a vital tool in future efforts to combat major public health challenges.  
37  
38  
39  
40  
41

42 **Objective:**  
43  
44  
45

46 In this systematic review, we aim to investigate the hypothesis that elevated suPAR is  
47  
48  
49 associated with increased risk of short-term and long-term mortality in healthy, general, and  
50  
51  
52 patient populations, independent of conventional risk factors.  
53  
54  
55  
56  
57



To this end, the proposed systematic review will answer the following questions:

Primary aim:

1. Do individuals with higher suPAR levels have a higher risk of mortality?

Secondary aims:

2. Is the association between suPAR and mortality present in healthy, general, and various patient populations?
3. Is the association between suPAR and mortality independent of conventional risk factors, such as age, sex, smoking, and chronic disease?
4. Is the association between suPAR and mortality independent of other inflammatory biomarkers?
5. What is the discrimination performance of suPAR for predicting mortality?
6. What clinical and study methodological characteristics explain heterogeneity in the results?

## METHODS AND ANALYSIS

### Review design:

The study protocol for this systematic review and meta-analysis was developed based on the PRISMA-P guidelines<sup>64,65</sup>.

This study will follow the recommendations on conducting and reporting systematic reviews and meta-analyses set forth by the PRISMA<sup>66</sup> and Meta-analysis of observational studies in epidemiology (MOOSE)<sup>67</sup> guidelines, as well as the updated CHARMS checklist for prognostic factors CHARMS-PF.<sup>63</sup>

### Eligibility criteria:

Studies on suPAR and mortality will be selected according to the criteria outlined below.

Study designs: We will include prospective or retrospective observational studies (cohorts, case-control studies, nested case-control studies) and control groups from intervention studies.

We will exclude animal experiments.

1  
2  
3  
4 Participants: We will include studies examining healthy human individuals, general human  
5  
6  
7 populations, or any human patient population. We will include studies of both children and  
8  
9  
10 adults without restrictions on ethnicity, sex, or disease status.

11  
12  
13 Index prognostic factor: We will include studies with suPAR measured in plasma or serum,  
14  
15  
16 independent of assay type, manufacturer, or sample storage time and conditions (whether  
17  
18  
19 suPAR was measured in fresh or frozen samples); this information will be collected for quality  
20  
21  
22 assessment and heterogeneity analysis (described below in detail). We will exclude studies  
23  
24  
25 where suPAR was not measured in blood (e.g., urine samples).  
26  
27

28  
29  
30 Comparators: We will investigate the unadjusted and adjusted prognostic value of suPAR, i.e.,  
31  
32  
33 without and with adjustments for other prognostic factors, e.g., conventional risk factors (such  
34  
35  
36 as age, sex, smoking, and chronic disease), inflammatory biomarkers (such as CRP, white  
37  
38  
39 blood cells, and IL-6), or kidney function (such as creatinine and glomerular filtration rate).  
40  
41  
42

43  
44 Outcomes: We will investigate the outcome of mortality. We will include studies with outcomes  
45  
46  
47 reported as unadjusted or adjusted effect estimates of relative risk (e.g., risk ratio [RR], odds  
48  
49  
50 ratio [OR], hazard ratio [HR]). In studies reporting mortality as part of a composite outcome  
51  
52  
53 measure, we will extract all individual outcomes as reported in the studies. We will extract the  
54  
55  
56

1  
2  
3 outcome in all data forms (for example, dichotomous—30-day mortality yes/no; continuous—  
4  
5  
6 time to death) as reported in the included studies. For studies reporting survival from time-to-  
7  
8  
9 event analyses, we will use this information to extract the number of deaths. Further, we will  
10  
11  
12 investigate the discriminative ability of suPAR as a secondary outcome, i.e., area under the  
13  
14  
15 curves (AUCs) for receiver operating characteristics (ROC) curve analyses of suPAR and  
16  
17  
18 mortality. We will exclude studies of deaths due to external/unnatural causes, such as homicide,  
19  
20  
21 suicides, accidents, drug overdoses, and medical errors.  
22  
23

24  
25  
26 Timing: We will investigate the association between suPAR and mortality during any given  
27  
28  
29 period of follow-up. We will exclude cross-sectional studies.  
30  
31

32  
33  
34 Setting: There will be no restrictions by type of setting.  
35  
36

37  
38 Language and publication type: We will include peer-reviewed studies in English or Danish  
39  
40  
41 published through 28 February 2020. We will exclude reviews, commentaries, correspondence,  
42  
43  
44 case reports, conference abstracts, expert opinions, editorials, experimental studies, and  
45  
46  
47 dissertations. A list of possibly relevant titles in other languages will be provided as an appendix.  
48  
49

50  
51 **Information sources:**  
52  
53  
54  
55  
56  
57

1  
2  
3 The following databases will be searched from their inception forward for potentially eligible  
4  
5  
6 studies published on or before 28 February 2020: 1) Medline via PubMed, 2) Embase via  
7  
8  
9 Elsevier, and 3) Scopus via Elsevier. The electronic database search will be supplemented with  
10  
11  
12 a hand search of reference lists of included studies, etc. Finally, we will circulate a bibliography  
13  
14  
15 of the included articles to the systematic review team, as well as to suPAR experts identified by  
16  
17  
18 the team. The electronic databases search will be carried out by KB (Biomedical Research  
19  
20  
21 Liaison Librarian), and the supplemental hand search will be carried out by J EVP and LJHR.  
22  
23  
24  
25

#### 26 **Search strategy:**

27  
28  
29  
30 The specific search strategy was created by a Biomedical Research Liaison Librarian (KB) with  
31  
32  
33 expertise in systematic review searching. The search strategy was developed with input from  
34  
35  
36 the project team. The search uses medical subject headings (MeSH) terms and keywords  
37  
38  
39 related to suPAR and mortality. No study design, date, or language limits will be imposed on the  
40  
41  
42 search. The following terms will be used to search the electronic databases in addition to other  
43  
44  
45 related terms for the concepts of “suPAR” and “mortality”:  
46  
47  
48  
49

50 “suPAR” or “soluble urokinase plasminogen activator receptor” or “soluble urokinase-type” or  
51  
52  
53 “soluble urokinase receptor” or “uPAR”  
54  
55  
56  
57

1  
2  
3 AND  
4  
5

6  
7 “mortality” or “death” or “fatality”  
8  
9

10  
11 The initial search will be performed on 28 February 2020. Searches will be repeated prior to  
12  
13 publication. The full PubMed search and search terms are shown in **Appendix 1**.  
14  
15

16  
17  
18 **Study records:**  
19

20  
21  
22 *Data management:*  
23

24  
25  
26 Citations extracted from electronic databases will be imported to EndNote. The Covidence  
27  
28 systematic review software will be used for the screening and review processes, including  
29  
30 removal of duplicates. For the actual data extraction, a data codebook will be a priori developed  
31  
32 in Microsoft Excel based on a pilot search, along with a manual describing the information to be  
33  
34 entered under each data item in the codebook.  
35  
36  
37  
38  
39  
40

41  
42  
43 *Selection process:*  
44

45  
46 Two reviewers (JEVP, LJHR) will independently screen titles and abstracts yielded by the  
47  
48 search to identify eligible studies according to the inclusion criteria. Studies that do not meet the  
49  
50 screening criteria will be excluded. We will obtain full reports for all titles that appear to meet the  
51  
52  
53  
54  
55  
56  
57

1  
2  
3 inclusion criteria or where there is any uncertainty. The same two reviewers (JEVP, LJHR) will  
4  
5  
6 independently review the full-text articles to assess for eligibility. The included and excluded  
7  
8  
9 studies will be checked and reasons for inclusion/exclusion will be verified. Disagreements will  
10  
11  
12 be resolved by consensus, or by a third author if necessary. Reasons for exclusion will be  
13  
14  
15 coded for both the initial screening and for the review of the full-text articles. The PRISMA flow  
16  
17  
18 diagram will be used to document the study selection process. An appendix with a reference list  
19  
20  
21 of all excluded studies will be included in the final manuscript. Neither of the reviewers will be  
22  
23  
24 blind to the article titles, study authors, or institutions. Multiple reports of a single study will be  
25  
26  
27 identified by juxtaposing author names, study names, institutions, study dates, etc. To avoid  
28  
29  
30 double counting, in cases of duplicate publications or multiple reports from the same study that  
31  
32  
33 all meet the inclusion criteria, the reviewers will select publications based on the following  
34  
35  
36 prioritization: reports with 1) adjusted analyses; 2) more covariates included; 3) bigger sample  
37  
38  
39 size. In cases where different reports from the same study provide unique data on different  
40  
41  
42 follow-up times, adjustments, or subgroups, unique information from the individual reports will  
43  
44  
45 be extracted for the main analysis, subgroup analyses, and meta-regressions.  
46  
47  
48  
49  
50

51  
52 ***Data collection process:***  
53  
54  
55  
56  
57

1  
2  
3 Data will be extracted from reports and entered in the Excel codebook in duplicate by the two  
4  
5  
6 independent reviewers (JEVP, LJHR). As mentioned, the data extraction codebook is developed  
7  
8  
9 a priori with statistical consultancy from TK. To ensure consistency across reviewers, we will  
10  
11  
12 conduct calibration exercises before starting the data extraction. The extracted data will include  
13  
14  
15 all the necessary information to describe and characterize the studies, assess the quality,  
16  
17  
18 synthesize data for the meta-analyses, and to assess heterogeneity. In case of missing data or  
19  
20  
21 insufficient reporting of details, the study's corresponding author will be contacted for  
22  
23  
24 clarification, if possible, by a maximum of three e-mail attempts. When data extraction is  
25  
26  
27 completed, both authors will review the codebooks and resolve any discrepancies by consensus  
28  
29  
30 or by a third author if necessary. Prior to correcting disagreements, the overall inter-rater  
31  
32  
33 agreement rate will be calculated using Cohen's  $\kappa$  statistic ( $>0.80$  is considered good). A list of  
34  
35  
36 extracted variables will be provided as an appendix in the final manuscript. For studies  
37  
38  
39 consisting of multiple groups of individuals (for example, healthy controls, patients with  
40  
41  
42 precancerous lesions, and patients with cancer), individual group information will be extracted to  
43  
44  
45 assess the association between suPAR and mortality for each group.  
46  
47  
48  
49  
50

51  
52 **Data items:**  
53  
54  
55  
56  
57



1  
2  
3 The major categories of extracted data will be: (1) study characteristics (author, journal, year of  
4  
5  
6 publication, country/region, funding sources, etc.); (2) study design (type of study, year of study  
7  
8  
9 start, duration of follow-up, etc.); (3) study population (sample size at baseline, population  
10  
11  
12 characteristics (healthy individuals, general population, patient types), age, sex, sample size at  
13  
14  
15 follow-up, reasons for loss to follow-up, information about treatments, etc.), (4) index suPAR  
16  
17  
18 (suPAR levels, distribution, assay type, manufacturer, comparison groups and cut-offs, etc.); (5)  
19  
20  
21 outcomes (including mortality/survival rates; cause of death; suPAR levels stratified by  
22  
23  
24 survivors/non-survivors; unadjusted, minimally adjusted, and most adjusted RR, OR and/or HR  
25  
26  
27 for short-term and long-term all-cause mortality; and true positive (TP), false positive (FP), true  
28  
29  
30 negative (TN), and false negative (FN) frequencies as well as AUCs for ROC curves); (6)  
31  
32  
33 control characteristics (conventional risk factors, e.g., age, sex, smoking, and chronic diseases;  
34  
35  
36 other inflammatory biomarkers, e.g., C-reactive protein (CRP), white blood cells, cytokines,  
37  
38  
39 fibrinogen; and kidney function, e.g., creatinine (measured or estimated), creatinine clearance,  
40  
41  
42 glomerular filtration rate (measured or estimated)); (7) setting (general population, healthcare  
43  
44  
45 setting, e.g., acute care, ICU, outpatients, etc.).  
46  
47  
48  
49  
50  
51

### 52 **Outcomes and prioritization:**

53  
54  
55  
56  
57

1  
2  
3 The primary outcome is all-cause mortality within any given follow-up period. Reports that are  
4  
5  
6 not indicating cause of deaths will be analyzed under all-cause mortality.  
7  
8  
9

10 When studies report mortality/survival rates at various time points of the follow-up, we have  
11  
12  
13 decided a priori to subdivide the mortality rates as follows:  
14  
15

- 16 1. Short-term mortality: Death within 30 days from baseline.
- 17
- 18 2. 30-365-day mortality: Death occurring between 30 days and 365 days from baseline.
- 19
- 20
- 21 3. Long-term mortality: Death occurring more than 365 days from baseline.
- 22
- 23
- 24
- 25
- 26
- 27

28 For the primary meta-analysis, the most long-term outcome will be used, i.e., if a study reports  
29  
30  
31 associations between suPAR and mortality at multiple time-points, the more long-term  
32  
33  
34 assessment of mortality will be used. Furthermore, we will conduct subgroup analyses  
35  
36  
37 stratifying studies reporting mortality within 30 days, between 30-365 days, and more than 365  
38  
39  
40 days, as described in detail in the *"Subgroup analyses and meta-regression"* section below.  
41  
42  
43

44 Secondary outcomes will be:

- 45
- 46
- 47
- 48 1. Short-term mortality (within 30 days) of any cause (all-cause mortality)
- 49
- 50
- 51 2. Cardiovascular mortality
- 52
- 53
- 54 3. Cancer mortality
- 55
- 56
- 57

- 1  
2  
3 4. Discriminative ability of suPAR, i.e., AUCs for ROC curves of suPAR and mortality for  
4  
5  
6 the most long-term outcome reported  
7  
8  
9

10 **Risk of bias in individual studies (quality assessment):**  
11  
12

13  
14 To facilitate the assessment of possible risk of bias, the methodological quality of each study will  
15  
16 be evaluated using the Quality in Prognosis Studies (QUIPS) tool, **Table 1**.<sup>68</sup> The QUIPS tool  
17  
18 assesses risk of bias across six domains in studies of prognostic factors: (1) study participation  
19  
20 (sampling bias); (2) study attrition (attrition bias); (3) prognostic factor measurement; (4)  
21  
22 outcome measurement; (5) study confounding; and (6) statistical analysis and reporting. The  
23  
24 QUIPS tool will be adapted to meet the specific needs of this systematic review. To ensure  
25  
26 consistency across reviewers, we will conduct calibration exercises before starting the quality  
27  
28 assessments. Neither of the reviewers will be blinded to studies during the quality assessment.  
29  
30 For each domain in the tool, we will describe the procedures undertaken for each study,  
31  
32 including verbatim quotes. If there is insufficient detail reported in the study, we will judge the  
33  
34 risk of bias as “unclear” and the study’s authors will be contacted for more information. Studies  
35  
36 will be considered to have a low, moderate, or high risk of bias according to the following scores  
37  
38 of low risk across domains: 5-6, 3-4, 0-2. The two reviewers (JEVP, LJHR) will assess the risk  
39  
40  
41  
42  
43  
44  
45  
46  
47  
48  
49  
50  
51  
52  
53  
54  
55  
56  
57  
58  
59  
60

1  
2  
3 of bias independent of each other. Any disagreements will be resolved by consensus, or if  
4  
5  
6 necessary by a third author, and a log of these will be included as an appendix in the final  
7  
8  
9 manuscript. No study will be excluded based on the results of risk of bias assessment. We will  
10  
11  
12 compute graphic representations of potential bias for the final manuscript. In the meta-analysis,  
13  
14  
15 subgroup analyses will be performed based on the risk of bias (QUIPS; low, moderate, or high  
16  
17  
18 risk of bias). The adapted QUIPS tool will be provided as an appendix in the final manuscript  
19  
20  
21 along with the log of disagreements.  
22  
23  
24  
25

#### 26 **Data synthesis:**

27  
28  
29  
30 Reported relative risks and their corresponding 95-99% confidence intervals will be used to  
31  
32  
33 assess the association between suPAR and most long-term mortality with random-effects meta-  
34  
35  
36 analyses to minimize between-study heterogeneity. A quantitative synthesis will be performed,  
37  
38  
39 and our outcomes will be studied separately in three pooled datasets: i) across all studies  
40  
41  
42 (despite a high degree of expected heterogeneity), ii) within studies of healthy/general  
43  
44  
45 populations, and iii) within studies of patient populations.  
46  
47  
48  
49

50 Relative risks with 95-99% CIs will be used as the common measure of association across  
51  
52  
53 studies. RRs, ORs, and HRs will be assumed to approximate the same measure of relative risk.  
54  
55  
56  
57

1  
2  
3 As previously described for CRP and albumin,<sup>69,70</sup> we will convert the reported study-specific  
4  
5  
6 relative risk estimates for suPAR onto a standardized scale of effect, comparing the highest  
7  
8  
9 third with the lowest third of the suPAR distribution, i.e., providing an estimate per 2.18 times  
10  
11  
12 standard deviation (SD) units of suPAR. 2.18 is the difference in the means of the top and  
13  
14  
15 bottom third of the standard normal distribution and is therefore used as the point estimate for  
16  
17  
18 the lower and upper third of the suPAR distribution when scaled with SD. This method assumes  
19  
20  
21 that suPAR follows a normal distribution, or a transformation of suPAR, such as the logarithm,  
22  
23  
24 follows a normal distribution. Additionally, it is assumed that the suPAR SD estimates within the  
25  
26  
27 studies are similar when scaling; if this is not the case additional adjustment to account for this  
28  
29  
30 will be done and differences between calculation methods will be reported. If we conclude that  
31  
32  
33 these assumptions cannot be made for the studies, separate relative risk estimates (per suPAR  
34  
35  
36 unit, log<sub>2</sub>(suPAR), Q1 vs Q4 suPAR, etc.) analyses will be made instead of the standardized  
37  
38  
39 scale analysis.  
40  
41  
42  
43  
44

45 For the primary analysis all study outcome measures (e.g., RR, OR, and HR) will be pooled as a  
46  
47  
48 single measure, and all available studies will be included, regardless of population. If a study  
49  
50  
51 has multiple versions of the same model with different adjustments, the model with most  
52  
53  
54 adjustments will be included. In addition, we will conduct separate subgroup analyses, as  
55  
56  
57

1  
2  
3 described below, to account for the heterogeneity across methods of reporting outcomes and  
4  
5  
6 variation in adjustments made.  
7

8  
9  
10 As suggested by Riley et al. 2019,<sup>63</sup> in addition to the main analysis, we will conduct multiple  
11  
12  
13 meta-analyses separately based on the most long-term outcome stratified on the following  
14  
15  
16 levels: (1) population level: all data, healthy/general populations, and patients; (2) model  
17  
18  
19 adjustment: unadjusted, minimally adjusted (age and sex), adjusted for some conventional risk  
20  
21  
22 factors (e.g., age, sex, chronic disease/Charlson score, smoking) or inflammatory markers (e.g.,  
23  
24  
25 CRP, cytokines, fibrinogen), and maximally adjusted (most adjusted estimate from each study);  
26  
27  
28 (3) outcome measure: RR, OR, and HR.  
29  
30  
31

32  
33 Statistical heterogeneity among studies will be evaluated using the  $\tau^2$  and  $I^2$  statistic (where  $I^2$   
34  
35  
36 of 30-60% will be interpreted to indicate moderate heterogeneity and  $I^2 > 50\%$  to indicate  
37  
38  
39 substantial heterogeneity across studies<sup>71</sup>). We will try to explain the source of heterogeneity by  
40  
41  
42 subgroup analysis or sensitivity analysis (see below).  
43  
44  
45

46  
47 Study characteristics of the included studies will be summarized in a table. To visually assess  
48  
49  
50 between-study variability, we will present the results and summary relative risks in Forest plots.  
51  
52  
53

1  
2  
3 Analysis of the predictive value of suPAR for mortality will be done by hierarchal summary  
4  
5  
6 receiver operation characteristic (HSROC) model curves. From this, SROC curves with AUCs,  
7  
8  
9  
10 Qs, and diagnostic odds ratios (DORs) will be produced.

11  
12  
13 As described for CRP by Hemingway et al.,<sup>69</sup> we will attempt to calculate the detection rate  
14  
15  
16 (sensitivity) at different false positive rates from 0 to 100 by constructing the log-normal  
17  
18  
19 distributions of suPAR separately for those who survived and those who died. From this we will  
20  
21  
22 obtain a ROC curve and report the c-statistic. Pooled estimates of both the c-statistic and  
23  
24  
25 detection rate of suPAR's discriminative ability for predicting mortality will be obtained by  
26  
27  
28 random effects meta-analysis of the study-specific c-statistics and detection rates. Confidence  
29  
30  
31 intervals and a 10% false positive rate will be reported.  
32  
33  
34  
35  
36

37 All statistical analyses will be performed using SAS Enterprise Guide (SAS Institute, Cary, NC)  
38  
39  
40 and R (R Foundation for Statistical Computing, Vienna, Austria) software.  
41  
42  
43

44 ***Subgroup analyses and meta-regression:***

45  
46  
47 In addition to the primary analysis of the most long-term mortality, separate analyses will be  
48  
49  
50 made for the following mortality outcomes: mortality within 30 days, 30-365 days, and long-term  
51  
52  
53  
54  
55  
56  
57

1  
2  
3 mortality (more than 365 days). These analyses will be done as described for the primary  
4  
5  
6 analysis above.  
7  
8  
9

10 Subgroup analyses will be used to explore possible sources of heterogeneity, and univariate  
11  
12 random effects meta-regression will be performed based on the following: study design (cohort,  
13  
14 case-control, randomized controlled trials); year of study start; sex; age groups; time of outcome  
15  
16 (within 30 days, 30-365 days, more than 365 days); reported relative risk estimates (e.g., RR,  
17  
18 OR, HR); population type (healthy/general population vs. patient types, e.g., cardiovascular  
19  
20 disease, cancer, chronic kidney disease, infectious disease, critical illness, acute care); cause of  
21  
22 death studied (all-cause, cardiovascular, cancer mortality, etc.); methods of suPAR  
23  
24 measurement; suPAR assay manufacturer; suPAR comparison group (continuous suPAR,  
25  
26 equal sized groups, unequal sized groups); region (North America + Europe, Asia, Africa, South  
27  
28 America); duration of follow-up; no. of adjustments; adjustment for CRP; adjustment for kidney  
29  
30 function; no. of events; risk of bias (QUIPS; low, moderate, high risk of bias).  
31  
32  
33  
34  
35  
36  
37  
38  
39  
40  
41  
42  
43  
44  
45

46 To explore other potential sources of heterogeneity, a random effects meta-regression model  
47  
48 will be employed, which includes study level continuous or categorical covariates.  
49  
50  
51  
52

53 ***Sensitivity analysis:***  
54  
55  
56  
57



1  
2  
3 Sensitivity analyses will be performed in which the pooled risk estimates are recalculated by  
4  
5  
6 removing the studies one by one and comparing the results. Furthermore, a sensitivity analysis  
7  
8  
9 of risk of bias will be performed by omitting studies that are judged to be at high risk of bias.  
10  
11  
12

### 13 **Meta-biases:**

14  
15  
16  
17 Small study bias (including publication bias) will be assessed with contour-enhanced Funnel  
18  
19  
20 plots, by Begg's adjusted rank correlation test, and by Egger's regression asymmetry test.  
21  
22  
23

### 24 **Confidence in cumulative evidence:**

25  
26  
27  
28 Reporting and interpretation of results will follow the reporting guidelines of PRISMA<sup>66</sup> and  
29  
30  
31 MOOSE.<sup>67</sup> Interpretation and translation of summary results will follow these guidelines as well  
32  
33  
34 as the steps recommended for prognostic factor studies by Riley et al. 2019.<sup>63</sup> The summary  
35  
36  
37 results will be discussed in terms of potential usefulness for clinical practice and need for future  
38  
39  
40 research.  
41  
42  
43

44  
45 Strength in the body of evidence will be further evaluated using the GRADE assessment  
46  
47  
48 (Grades of Recommendation, Assessment, Development, and Evaluation).<sup>72,73</sup> However, this  
49  
50  
51 approach was developed for the assessment of intervention effectiveness in reviews of  
52  
53  
54  
55  
56  
57  
58  
59  
60

1  
2  
3 interventions and not for assessing the certainty of summary results of systematic reviews of  
4  
5  
6 prognostic factors; allowing for heterogeneity in the latter case may be more acceptable.<sup>63</sup>  
7  
8  
9

10 **Patient and public involvement:**  
11  
12

13  
14 No patients involved.  
15  
16  
17  
18  
19  
20  
21  
22  
23  
24  
25  
26  
27  
28  
29  
30  
31  
32  
33  
34  
35  
36  
37  
38  
39  
40  
41  
42  
43  
44  
45  
46  
47  
48  
49  
50  
51  
52  
53  
54  
55  
56  
57  
58  
59  
60

For peer review only

## DISCUSSION

The biomarker suPAR has been suggested to be a prognostic biomarker in the general population and various patient populations. However, clinical guidelines and cut-offs are still lacking, hampering the wide clinical utilization of suPAR. Our findings in this systematic review and meta-analysis will clarify the association between suPAR and mortality, and establish its prognostic value across healthy and ill individuals, providing support for development of future clinical guidelines. Thus, we will discuss the usefulness of suPAR in clinical practice, in particular settings, or as a general marker of prognosis across populations.

Only few randomized studies have investigated the value of adding suPAR as a prognostic biomarker to inform clinical practice,<sup>74,75</sup> and most evidence is based on observational studies of suPAR, but many studies have reported an association between suPAR and mortality.

Summarizing this evidence is important to establish the prognostic role of suPAR. This protocol has been developed in compliance with recommended guidelines for prognostic factor studies,<sup>63</sup> including PRISMA-P,<sup>64</sup> and it provides a clear and structured protocol for maximizing data extraction and summarizing the relevant information on the importance of suPAR as a prognostic marker of mortality.

1  
2  
3 suPAR is used as a marker of inflammation, and as such, many studies have compared it with  
4  
5  
6  
7 CRP, although suPAR has been suggested to be a marker of chronic rather than acute  
8  
9  
10 inflammation while CRP is an acute-phase reactant and potentially reflects a distinct aspect of  
11  
12  
13 inflammation. In adjusted analyses, suPAR has been shown to be associated with mortality  
14  
15  
16 independent of CRP.<sup>8,76</sup> In our analyses, we aim to investigate the associations between suPAR  
17  
18  
19 and mortality in studies adjusting for CRP to assess the effect over and above CRP. The  
20  
21  
22 advantage of using a chronic inflammation marker rather than an acute-phase reactant for  
23  
24  
25 prognostication includes the lower variation and sensitivity towards acute, short-term influences  
26  
27  
28 and a better assessment of underlying health status.  
29  
30  
31  
32  
33 Blood suPAR levels have been associated with kidney function<sup>77</sup> and proposed a causal factor  
34  
35  
36 of certain chronic kidney diseases.<sup>78</sup> The potential causal effect in kidney disease is outside the  
37  
38  
39 scope of this review. However, we will investigate whether suPAR is associated with mortality in  
40  
41  
42 individuals with and without chronic kidney disease.  
43  
44  
45

46 Our primary aim of summarizing all evidence of suPAR and mortality in one meta-analysis  
47  
48  
49 imposes a high degree of study population heterogeneity on this study; however, to establish an  
50  
51  
52 association between suPAR and mortality, it is important to summarize the information available  
53  
54  
55  
56  
57  
58  
59  
60

1  
2  
3 on this issue and it will provide us with a general estimate of association. We will account for the  
4  
5  
6 heterogeneity by performing meta-regressions and stratified analyses to investigate the  
7  
8  
9 association in more homogeneous subsets of the literature.  
10  
11

12  
13 This systematic review and meta-analysis will provide an up-to-date global overview of the  
14  
15 current literature on suPAR and mortality. If our results indicate an association between suPAR  
16  
17 level and mortality risk, suPAR may constitute an easily measurable, accurate chronic  
18  
19 inflammation biomarker with a well described association with mortality, which could be a vital  
20  
21 tool in future efforts to combat major public health challenges, such as chronic disease  
22  
23 prevention and premature mortality, and improve future research on this topic.  
24  
25  
26  
27  
28  
29  
30  
31  
32  
33  
34  
35  
36  
37  
38  
39  
40  
41  
42  
43  
44  
45  
46  
47  
48  
49  
50  
51  
52  
53  
54  
55  
56  
57  
58  
59  
60

1  
2  
3 **ETHICS AND DISSEMINATION:**  
4  
5

6  
7 This systematic review will synthesize evidence on the use of suPAR as a prognostic marker for  
8 mortality based on published publicly available studies and data. The study will not obtain, store,  
9  
10  
11 or report any individual-level personal information and there will be no concerns about privacy.  
12  
13  
14

15  
16 Therefore ethical approval is not necessary for this systematic review. The results will be  
17  
18  
19  
20 disseminated by publication in a peer-reviewed journal.  
21  
22  
23  
24  
25  
26  
27  
28  
29  
30  
31  
32  
33  
34  
35  
36  
37  
38  
39  
40  
41  
42  
43  
44  
45  
46  
47  
48  
49  
50  
51  
52  
53  
54  
55  
56  
57  
58  
59  
60

## REFERENCES

1. Hunter P. The inflammation theory of disease. The growing realization that chronic inflammation is crucial in many diseases opens new avenues for treatment. *EMBO Rep.* 2012;13(11):968-970.  
doi:10.1038/embor.2012.142
2. Medzhitov R. Inflammation 2010: New Adventures of an Old Flame. *Cell.* 2010;140(6):771-776.  
doi:10.1016/j.cell.2010.03.006
3. Franceschi C, Campisi J. Chronic inflammation (inflammaging) and its potential contribution to age-associated diseases. *J Gerontol A Biol Sci Med Sci.* 2014;69 Suppl 1:S4-9.  
doi:10.1093/gerona/glu057
4. Michaud M, Balardy L, Moulis G, et al. Proinflammatory cytokines, aging, and age-related diseases. *J Am Med Dir Assoc.* 2013;14(12):877-882. doi:10.1016/j.jamda.2013.05.009
5. Thunø M, Macho B, Eugen-Olsen J. suPAR: The molecular crystal ball. *Dis Markers.* 2009;27(3):157-172.
6. Desmedt S, Desmedt V, Delanghe JR, Speeckaert R, Speeckaert MM. The intriguing role of soluble urokinase receptor in inflammatory diseases. *Crit Rev Clin Lab Sci.* 2017;54(2):117-133.  
doi:10.1080/10408363.2016.1269310
7. Eugen-Olsen J, Andersen O, Linneberg A, et al. Circulating soluble urokinase plasminogen activator receptor predicts cancer, cardiovascular disease, diabetes and mortality in the general population. *J Intern Med.* 2010;268(3):296-308.

- 1  
2  
3  
4 8. Rasmussen LJH, Ladelund S, Haupt TH, et al. Soluble urokinase plasminogen activator receptor  
5  
6 (suPAR) in acute care: A strong marker of disease presence and severity, readmission and  
7  
8 mortality. A retrospective cohort study. *Emerg Med J*. 2016;33(11):769-775.  
9  
10  
11  
12 doi:10.1136/emered-2015-205444  
13  
14  
15 9. Shuai T, Pei Jing Y, Huang Q, et al. Serum soluble urokinase type plasminogen activated receptor  
16  
17 and focal segmental glomerulosclerosis: A systematic review and meta-analysis. *BMJ Open*.  
18  
19  
20 2019;9(10):e031812. doi:10.1136/bmjopen-2019-031812  
21  
22  
23  
24 10. Lee JM, Yang JW, Kronbichler A, et al. Increased serum soluble urokinase-type plasminogen  
25  
26 activator receptor (suPAR) Levels in FSGS: A Meta-Analysis. *J Immunol Res*.  
27  
28  
29 2019;2019:5679518. doi:10.1155/2019/5679518  
30  
31  
32  
33 11. Pregernig A, Müller M, Held U, Beck-Schimmer B. Prediction of mortality in adult patients with  
34  
35 sepsis using six biomarkers: a systematic review and meta-analysis. *Ann Intensive Care*.  
36  
37  
38 2019;9(1):125. doi:10.1186/s13613-019-0600-1  
39  
40  
41  
42 12. Backes Y, Van Der Sluijs KF, Mackie DP, et al. Usefulness of suPAR as a biological marker in  
43  
44 patients with systemic inflammation or infection: A systematic review. *Intensive Care Med*.  
45  
46  
47 2012;38(9):1418-1428. doi:10.1007/s00134-012-2613-1  
48  
49  
50  
51 13. Ni W, Han Y, Zhao J, et al. Serum soluble urokinase-type plasminogen activator receptor as a  
52  
53 biological marker of bacterial infection in adults: A systematic review and meta-Analysis. *Sci Rep*.  
54  
55  
56 2016;6:39481. doi:10.1038/srep39481  
57  
58  
59  
60



- 1  
2  
3  
4  
5  
6  
7  
8  
9  
10  
11  
12  
13  
14  
15  
16  
17  
18  
19  
20  
21  
22  
23  
24  
25  
26  
27  
28  
29  
30  
31  
32  
33  
34  
35  
36  
37  
38  
39  
40  
41  
42  
43  
44  
45  
46  
47  
48  
49  
50  
51  
52  
53  
54  
55  
56  
57  
58  
59  
60
14. Huang Q, Xiong H, Yan P, et al. The Diagnostic and Prognostic Value of Supar in Patients with Sepsis: A Systematic Review and Meta-Analysis. *Shock*. September 2019.  
doi:10.1097/SHK.0000000000001434
  15. Haastrup E, Grau K, Eugen-Olsen J, Thorball C, Kessing LV, Ullum H. Soluble urokinase plasminogen activator receptor as a marker for use of antidepressants. *PLoS One*. 2014;9(10):e110555. doi:10.1371/journal.pone.0110555
  16. Persson M, Östling G, Smith G, et al. Soluble Urokinase Plasminogen Activator Receptor: A Risk Factor for Carotid Plaque, Stroke, and Coronary Artery Disease. *Stroke*. 2014;45(1):18-23.
  17. Lyngbæk S, Marott JL, Møller D V, et al. Usefulness of soluble urokinase plasminogen activator receptor to predict repeat myocardial infarction and mortality in patients with ST-segment elevation myocardial infarction undergoing primary percutaneous intervention. *Am J Cardiol*. 2012;110(12):1756-1763. doi:10.1016/j.amjcard.2012.08.008
  18. Westin O, Rasmussen LJH, Andersen O, Buch E, Eugen-Olsen J, Friberg J. Soluble Urokinase Plasminogen Activator Receptor (suPAR) as a Predictor of Incident Atrial Fibrillation. *J Atr Fibrillation*. 2018;10(6):1801.
  19. Theilade S, Lyngbaek S, Hansen TW, et al. Soluble urokinase plasminogen activator receptor levels are elevated and associated with complications in patients with type 1 diabetes. *J Intern Med*. 2015;277(3):362-371.
  20. Heraclides A, Jensen TM, Rasmussen SS, et al. The pro-inflammatory biomarker soluble

- 1  
2  
3 urokinase plasminogen activator receptor (suPAR) is associated with incident type 2 diabetes  
4  
5  
6 among overweight but not obese individuals with impaired glucose regulation: Effect modification  
7  
8  
9 by smoking and body weight. *Diabetologia*. 2013;56(7):1542-1546. doi:10.1007/s00125-013-2914-  
10  
11  
12 0  
13  
14  
15 21. Guthoff M, Wagner R, Randrianarisoa E, et al. Soluble urokinase receptor (suPAR) predicts  
16  
17 microalbuminuria in patients at risk for type 2 diabetes mellitus. *Sci Rep*. 2017;7:40627.  
18  
19  
20  
21 doi:10.1038/srep40627  
22  
23  
24 22. Mustjoki S, Sidenius N, Sier CF, et al. Soluble urokinase receptor levels correlate with number of  
25  
26 circulating tumor cells in acute myeloid leukemia and decrease rapidly during chemotherapy.  
27  
28  
29  
30  
31  
32  
33 23. Mustjoki S, Alitalo R, Stephens RW, Vaheri A. Blast cell-surface and plasma soluble urokinase  
34  
35 receptor in acute leukemia patients: relationship to classification and response to therapy. *Thromb*  
36  
37  
38  
39  
40  
41  
42 24. Jing J, Zheng S, Han C, Du L, Guo Y, Wang P. Evaluating the value of uPAR of serum and tissue  
43  
44 on patients with cervical cancer. *J Clin Lab Anal*. 2012;26(1):16-21. doi:10.1002/jcla.20499  
45  
46  
47  
48  
49  
50  
51  
52  
53 25. Riisbro R, Stephens RW, Brünner N, et al. Soluble urokinase plasminogen activator receptor in  
54  
55 preoperatively obtained plasma from patients with gynecological cancer or benign gynecological  
56  
57 diseases. *Gynecol Oncol*. 2001;82(3):523-531. doi:10.1006/gyno.2001.6324  
58  
59  
60 26. Lomholt AF, Høyer-Hansen G, Nielsen HJ, Christensen IJ. Intact and cleaved forms of the

- 1  
2  
3 urokinase receptor enhance discrimination of cancer from non-malignant conditions in patients  
4  
5  
6 presenting with symptoms related to colorectal cancer. *Br J Cancer*. 2009;101(6):992-997.  
7  
8  
9 doi:10.1038/sj.bjc.6605228  
10  
11  
12 27. Usnarska-Zubkiewicz L, Strutyńska-Karpińska M, Zubkiewicz-Kucharska A, Zarębski P,  
13  
14 Grabowski K. Soluble urokinase-type plasminogen activator receptor and ferritin concentration in  
15  
16 patients with advanced alimentary tract carcinoma. Relationship to localization, surgical treatment  
17  
18 and the stage of the disease - Preliminary report. *Adv Clin Exp Med*. 2014;23(6):959-967.  
19  
20  
21 doi:10.17219/acem/30817  
22  
23  
24  
25  
26 28. Fidan E, Mentese A, Ozdemir F, et al. Diagnostic and prognostic significance of CA IX and suPAR  
27  
28 in gastric cancer. *Med Oncol*. 2013;30(2):540. doi:10.1007/s12032-013-0540-9  
29  
30  
31  
32 29. Chounta A, Ellinas C, Tzanetakou V, et al. Serum soluble urokinase plasminogen activator  
33  
34 receptor as a screening test for the early diagnosis of hepatocellular carcinoma. *Liver Int*.  
35  
36 2015;35(2):601-607. doi:10.1111/liv.12705  
37  
38  
39  
40  
41 30. Rubio-Jurado B, Tello-González A, Bustamante-Chávez L, de la Peña A, Riebeling-Navarro C,  
42  
43 Nava-Zavala AH. Circulating Levels of Urokinase-Type Plasminogen Activator Receptor and D-  
44  
45 Dimer in Patients With Hematological Malignancies. *Clin Lymphoma Myeloma Leuk*.  
46  
47 2015;15(10):621-626. doi:10.1016/j.clml.2015.07.632  
48  
49  
50  
51  
52 31. Henic E, Borgfeldt C, Christensen IJ, Casslén B, Høyer-Hansen G. Cleaved forms of the  
53  
54 urokinase plasminogen activator receptor in plasma have diagnostic potential and predict  
55  
56  
57  
58  
59  
60

- 1  
2  
3 postoperative survival in patients with ovarian cancer. *Clin Cancer Res.* 2008;14(18):5785-5793.  
4  
5  
6 doi:10.1158/1078-0432.CCR-08-0096  
7  
8
- 9 32. Wach S, Al-Janabi O, Weigelt K, et al. The combined serum levels of miR-375 and urokinase  
10  
11 plasminogen activator receptor are suggested as diagnostic and prognostic biomarkers in prostate  
12  
13 cancer. *Int J Cancer.* 2015;137(6):1406-1416. doi:10.1002/ijc.29505  
14  
15  
16
- 17 33. Cobos E, Jumper C, Lox C. Pretreatment Determination of the Serum Urokinase Plasminogen  
18  
19 Activator and its Soluble Receptor in Advanced Small-Cell Lung Cancer or Non-Small-Cell Lung  
20  
21 Cancer. *Clin Appl Thromb.* 2003;9(3):241-246. doi:10.1177/107602960300900309  
22  
23  
24  
25
- 26 34. Miyake H, Hara I, Yamanaka K, Gohji K, Arakawa S, Kamidono S. Elevation of serum levels of  
27  
28 urokinase-type plasminogen activator and its receptor is associated with disease progression and  
29  
30 prognosis in patients with prostate cancer. *Prostate.* 1999;39(2):123-129. doi:10.1002/(SICI)1097-  
31  
32 0045(19990501)39:2<123::AID-PROS7>3.0.CO;2-2  
33  
34  
35  
36
- 37 35. Rigolin GM, Tieghi A, Ciccone M, et al. Soluble urokinase-type plasminogen activator receptor  
38  
39 (suPAR) as an independent factor predicting worse prognosis and extra-bone marrow involvement  
40  
41 in multiple myeloma patients. *Br J Haematol.* 2003;120(6):953-959. doi:10.1046/j.1365-  
42  
43 2141.2003.04176.x  
44  
45  
46  
47
- 48 36. Riisbro R, Christensen IJ, Piironen T, et al. Prognostic significance of soluble urokinase  
49  
50 plasminogen activator receptor in serum and cytosol of tumor tissue from patients with primary  
51  
52 breast cancer. *Clin Cancer Res.* 2002;8(5):1132-1141.  
53  
54  
55  
56  
57

- 1  
2  
3  
4 37. Enocsson H, Wetterö J, Skogh T, Sjöwall C. Soluble urokinase plasminogen activator receptor  
5  
6 levels reflect organ damage in systemic lupus erythematosus. *Transl Res*. 2013;162(5):287-296.  
7  
8  
9 doi:10.1016/j.trsl.2013.07.003  
10  
11  
12 38. Toldi G, Bekő G, Kádár G, et al. Soluble urokinase plasminogen activator receptor (suPAR) in the  
13  
14 assessment of inflammatory activity of rheumatoid arthritis patients in remission. *Clin Chem Lab*  
15  
16  
17  
18 *Med*. 2013;51(2):327-332. doi:10.1515/cclm-2012-0221  
19  
20  
21 39. Portelli MA, Siedlinski M, Stewart CE, et al. Genome-wide protein QTL mapping identifies human  
22  
23 plasma kallikrein as a post-translational regulator of serum uPAR levels. *FASEB J*.  
24  
25  
26 2014;28(2):923-934. doi:10.1096/fj.13-240879  
27  
28  
29 40. Zimmermann HW, Koch A, Seidler S, Trautwein C, Tacke F. Circulating soluble urokinase  
30  
31 plasminogen activator is elevated in patients with chronic liver disease, discriminates stage and  
32  
33 aetiology of cirrhosis and predicts prognosis. *Liver Int*. 2012;32(3):500-509.  
34  
35  
36  
37  
38 41. Wiese S, Mortensen C, Gøtze JP, et al. Cardiac and proinflammatory markers predict prognosis in  
39  
40 cirrhosis. *Liver Int*. 2014;34(6):e19-30. doi:10.1111/liv.12428  
41  
42  
43  
44 42. Sjöwall C, Martinsson K, Cardell K, Ekstedt M, Kechagias S. Soluble urokinase plasminogen  
45  
46 activator receptor levels are associated with severity of fibrosis in nonalcoholic fatty liver disease.  
47  
48  
49  
50 *Transl Res*. 2015;165(6):658-666. doi:10.1016/j.trsl.2014.09.007  
51  
52  
53 43. Meijers B, Poesen R, Claes K, et al. Soluble urokinase receptor is a biomarker of cardiovascular  
54  
55 disease in chronic kidney disease. *Kidney Int*. 2015;87(1):210-216.  
56  
57

- 1  
2  
3 44. Schaefer F, Trachtman H, Wühl E, et al. Association of serum soluble urokinase receptor levels  
4  
5  
6 with progression of kidney disease in children. *JAMA Pediatr.* 2017;171(11):e172914.  
7  
8  
9 doi:10.1001/jamapediatrics.2017.2914  
10  
11  
12 45. Sevgi DY, Bayraktar B, Gündüz A, et al. Serum soluble urokinase-type plasminogen activator  
13  
14  
15 receptor and interferon- $\gamma$ -induced protein 10 levels correlate with significant fibrosis in chronic  
16  
17  
18 hepatitis B. *Wien Klin Wochenschr.* 2016;128(1-2):28-33. doi:10.1007/s00508-015-0886-4  
19  
20  
21 46. Sidenius N, Sier C, Ullum H, et al. Serum level of soluble urokinase-type plasminogen activator  
22  
23  
24 receptor is a strong and independent predictor of survival in human immunodeficiency virus  
25  
26  
27 infection. *Blood.* 2000;96(13):4091-4095.  
28  
29  
30 47. Kirkegaard-Klitbo DM, Langkilde A, Mejer N, Andersen O, Eugen-Olsen J, Benfield T. Soluble  
31  
32  
33 Urokinase Plasminogen Activator Receptor Is a Predictor of Incident Non-AIDS Comorbidity and  
34  
35  
36 All-Cause Mortality in Human Immunodeficiency Virus Type 1 Infection. *J Infect Dis.*  
37  
38  
39 2017;216(7):819-823. doi:10.1093/infdis/jix266  
40  
41  
42 48. Hoenigl M, Raggam RB, Wagner J, et al. Diagnostic accuracy of soluble urokinase plasminogen  
43  
44  
45 activator receptor (suPAR) for prediction of bacteremia in patients with systemic inflammatory  
46  
47  
48 response syndrome. *Clin Biochem.* 2013;46(3):225-229. doi:10.1016/j.clinbiochem.2012.11.004  
49  
50  
51 49. Wittenhagen P, Kronborg G, Weis N, et al. The plasma level of soluble urokinase receptor is  
52  
53  
54 elevated in patients with *Streptococcus pneumoniae* bacteraemia and predicts mortality. *Clin*  
55  
56  
57 *Microbiol Infect.* 2004;10(5):409-415. doi:10.1111/j.1469-0691.2004.00850.x  
58  
59  
60

- 1  
2  
3 50. Donadello K, Scolletta S, Taccone FS, et al. Soluble urokinase-type plasminogen activator  
4  
5  
6 receptor as a prognostic biomarker in critically ill patients. *J Crit Care*. 2014;29(1):144-149.  
7  
8  
9 doi:10.1016/j.jcrc.2013.08.005  
10  
11  
12 51. Koch A, Voigt S, Kruschinski C, et al. Circulating soluble urokinase plasminogen activator receptor  
13  
14  
15 is stably elevated during the first week of treatment in the intensive care unit and predicts mortality  
16  
17  
18 in critically ill patients. *Crit Care*. 2011;15(1):R63. doi:10.1186/cc10037  
19  
20  
21 52. Tzanakaki G, Paparoupa M, Kyprianou M, Barbouni A, Eugen-Olsen J, Kourea-Kremastinou J.  
22  
23  
24 Elevated soluble urokinase receptor values in CSF, age and bacterial meningitis infection are  
25  
26  
27 independent and additive risk factors of fatal outcome. *Eur J Clin Microbiol Infect Dis*.  
28  
29  
30 2012;31(6):1157-1162. doi:10.1007/s10096-011-1423-7  
31  
32  
33 53. Østergaard C, Benfield T, Lundgren JD, Eugen-Olsen J. Soluble urokinase receptor is elevated in  
34  
35  
36 cerebrospinal fluid from patients with purulent meningitis and is associated with fatal outcome.  
37  
38  
39 *Scand J Infect Dis*. 2004;36(1):14-19. doi:10.1080/00365540310017366  
40  
41  
42 54. Wittenhagen P, Andersen JB, Hansen A, et al. Plasma soluble urokinase plasminogen activator  
43  
44  
45 receptor in children with urinary tract infection. *Biomark Insights*. 2011;6:79-82.  
46  
47  
48 doi:10.4137/BMI.S6876  
49  
50  
51 55. Wrotek A, Jackowska T, Pawlik K. Soluble urokinase plasminogen activator receptor: an indicator  
52  
53  
54 of pneumonia severity in children. *Adv Exp Med Biol*. 2015;835:1-7. doi:10.1007/5584\_2014\_40  
55  
56  
57 56. Savva A, Raftogiannis M, Baziaka F, et al. Soluble urokinase plasminogen activator receptor

- 1  
2  
3 (suPAR) for assessment of disease severity in ventilator-associated pneumonia and sepsis. *J*  
4  
5  
6 *Infect.* 2011;63(5):344-350. doi:10.1016/j.jinf.2011.07.016  
7  
8  
9 57. Rabna P, Andersen A, Wejse C, et al. Utility of the plasma level of suPAR in monitoring risk of  
10  
11 mortality during TB treatment. *PLoS One.* 2012;7(8):e43933. doi:10.1371/journal.pone.0043933  
12  
13  
14  
15 58. Perch M, Kofoed P, Fischer TK, et al. Serum levels of soluble urokinase plasminogen activator  
16  
17 receptor is associated with parasitemia in children with acute *Plasmodium falciparum* malaria  
18  
19 infection. *Parasite Immunol.* 2004;26(5):207-211.  
20  
21  
22  
23  
24 59. Plewes K, Royakkers AA, Hanson J, et al. Correlation of biomarkers for parasite burden and  
25  
26 immune activation with acute kidney injury in severe *falciparum* malaria. *Malar J.* 2014;13:91.  
27  
28  
29  
30  
31  
32  
33  
34  
35  
36  
37  
38  
39  
40  
41 60. Andersen O, Eugen-Olsen J, Kofoed K, Iversen J, Haugaard SB. Soluble Urokinase Plasminogen  
42  
43 Activator Receptor is a Marker of Dysmetabolism in HIV-Infected Patients Receiving Highly Active  
44  
45 Antiretroviral Therapy. *J Med Virol.* 2008;80(2):209-216.  
46  
47  
48  
49  
50 61. Rasmussen LJH, Moffitt TE, Arseneault L, et al. Association of Adverse Experiences and  
51  
52 Exposure to Violence in Childhood and Adolescence With Inflammatory Burden in Young People.  
53  
54  
55  
56  
57  
58  
59  
60  
61  
62 62. Rasmussen LJH, Moffitt TE, Eugen-Olsen J, et al. Cumulative childhood risk is associated with a  
63  
64 new measure of chronic inflammation in adulthood. *J Child Psychol Psychiatry.* 2019;60(2):199-  
65  
66  
67  
68  
69  
70  
208. doi:10.1111/jcpp.12928



- 1  
2  
3  
4  
5  
6  
7  
8  
9  
10  
11  
12  
13  
14  
15  
16  
17  
18  
19  
20  
21  
22  
23  
24  
25  
26  
27  
28  
29  
30  
31  
32  
33  
34  
35  
36  
37  
38  
39  
40  
41  
42  
43  
44  
45  
46  
47  
48  
49  
50  
51  
52  
53  
54  
55  
56  
57  
58  
59  
60
63. Riley RD, Moons KGM, Snell KIE, et al. A guide to systematic review and meta-analysis of prognostic factor studies. *BMJ*. 2019;364:k4597. doi:10.1136/bmj.k4597
64. Shamseer L, Moher D, Clarke M, et al. Preferred reporting items for systematic review and meta-analysis protocols (PRISMA-P) 2015: Elaboration and explanation. *BMJ*. 2015;350:g7647. doi:10.1136/bmj.g7647
65. Moher D, Shamseer L, Clarke M, et al. Preferred reporting items for systematic review and meta-analysis protocols (PRISMA-P) 2015 statement. *Syst Rev*. 2015;4:1. doi:10.1186/2046-4053-4-1
66. Moher D, Liberati A, Tetzlaff J, Altman DG, PRISMA Group. Preferred reporting items for systematic reviews and meta-analyses: the PRISMA statement. *BMJ*. 2009;339:b2535. doi:10.1136/bmj.b2535
67. Stroup DF, Berlin JA, Morton SC, et al. Meta-analysis of observational studies in epidemiology - a proposal for reporting. Meta-analysis Of Observational Studies in Epidemiology (MOOSE) group. *JAMA*. 2000;283(15):2008-2012. doi:10.1007/978-94-007-3024-3\_10
68. Hayden JA, van der Windt DA, Cartwright JL, Côté P, Bombardier C. Assessing bias in studies of prognostic factors. *Ann Intern Med*. 2013;158(4):280-286. doi:10.7326/0003-4819-158-4-201302190-00009
69. Hemingway H, Philipson P, Chen R, et al. Evaluating the quality of research into a single prognostic biomarker: A systematic review and meta-analysis of 83 studies of C-reactive protein in stable coronary artery disease. *PLoS Med*. 2010;7(6):e1000286.

- 1  
2  
3  
4  
5  
6  
7  
8  
9  
10  
11  
12  
13  
14  
15  
16  
17  
18  
19  
20  
21  
22  
23  
24  
25  
26  
27  
28  
29  
30  
31  
32  
33  
34  
35  
36  
37  
38  
39  
40  
41  
42  
43  
44  
45  
46  
47  
48  
49  
50  
51  
52  
53  
54  
55  
56  
57  
58  
59  
60
- doi:10.1371/journal.pmed.1000286
70. Chêne G, Thompson SG. Methods for summarizing the risk associations of quantitative variables in epidemiologic studies in a consistent form. *Am J Epidemiol.* 1996;144(6):610-621.
- doi:10.1093/oxfordjournals.aje.a008971
71. Higgins JPT, Thomas J, Chandler J, Cumpston M, Li T, Page MJ WV (editors). Cochrane Handbook for Systematic Reviews of Interventions version 6.0 (updated July 2019). Cochrane, 2019. Available from [www.training.cochrane.org/handbook](http://www.training.cochrane.org/handbook).
72. Guyatt GH, Oxman AD, Vist GE, et al. GRADE: An emerging consensus on rating quality of evidence and strength of recommendations. *BMJ.* 2008;336(7650):924-926. doi:doi:10.1136/bmj.39489.470347.AD
73. Huguet A, Hayden JA, Stinson J, et al. Judging the quality of evidence in reviews of prognostic factor research: Adapting the GRADE framework. *Syst Rev.* 2013;2:71. doi:10.1186/2046-4053-2-71
74. Schultz M, Rasmussen LJH, Andersen MH, et al. Use of the prognostic biomarker suPAR in the emergency department improves risk stratification but has no effect on mortality: a cluster-randomized clinical trial (TRIAGE III). *Scand J Trauma Resusc Emerg Med.* 2018;26(1):69.
75. Schultz M, Rasmussen LJH, Kallemose T, et al. Availability of suPAR in emergency departments may improve risk stratification: A secondary analysis of the TRIAGE III trial. *Scand J Trauma Resusc Emerg Med.* 2019;27(1):43. doi:10.1186/s13049-019-0621-7

- 1  
2  
3  
4 76. Botha S, Fourie CM, Schutte R, Eugen-Olsen J, Pretorius R, Schutte AE. Soluble urokinase  
5  
6 plasminogen activator receptor as a prognostic marker of all-cause and cardiovascular mortality in  
7  
8 a black population. *Int J Cardiol.* 2015;184:631-636. doi:10.1016/j.ijcard.2015.03.041  
9  
10  
11  
12 77. Hayek SS, Sever S, Ko YA, et al. Soluble Urokinase Receptor and Chronic Kidney Disease. *N*  
13  
14  
15 *Engl J Med.* 2015;373(20):1916-1925. doi:10.1056/NEJMoa1506362  
16  
17  
18 78. Wei C, El Hindi S, Li J, et al. Circulating urokinase receptor as a cause of focal segmental  
19  
20  
21 glomerulosclerosis. *Nat Med.* 2011;17(8):952-960. doi:10.1038/nm.2411  
22  
23  
24  
25  
26  
27  
28  
29  
30  
31  
32  
33  
34  
35  
36  
37  
38  
39  
40  
41  
42  
43  
44  
45  
46  
47  
48  
49  
50  
51  
52  
53  
54  
55  
56  
57  
58  
59  
60

| <b>Table 1. QUIPS Risk of Bias Assessment Instrument for Prognostic Factor (PF) Studies</b> |                                                                                                                                                                                                                                                                                                                      |
|---------------------------------------------------------------------------------------------|----------------------------------------------------------------------------------------------------------------------------------------------------------------------------------------------------------------------------------------------------------------------------------------------------------------------|
| <b>Biases</b>                                                                               | <b>Issues to consider for judging overall rating of "Risk of bias"</b>                                                                                                                                                                                                                                               |
| Instructions to assess the risk of each potential bias:                                     | These issues will guide your thinking and judgment about the overall risk of bias within each of the 6 domains. Some 'issues' may not be relevant to the specific study or the review research question. These issues are taken together to inform the overall judgment of potential bias for each of the 6 domains. |
| <b>1. Study Participation</b>                                                               | <b>Goal: To judge the risk of selection bias (likelihood that relationship between <i>PF</i> and <i>outcome</i> is different for participants and eligible non-participants).</b>                                                                                                                                    |
| <i>Source of target population</i>                                                          | The source population or population of interest is adequately described for key characteristics.                                                                                                                                                                                                                     |
| <i>Method used to identify population</i>                                                   | The sampling frame and recruitment are adequately described, including methods to identify the sample sufficient to limit potential bias (number and type used, e.g., referral patterns in health care)                                                                                                              |
| <i>Recruitment period</i>                                                                   | Period of recruitment is adequately described                                                                                                                                                                                                                                                                        |
| <i>Place of recruitment</i>                                                                 | Place of recruitment (setting and geographic location) are adequately described                                                                                                                                                                                                                                      |
| <i>Inclusion and exclusion criteria</i>                                                     | Inclusion and exclusion criteria are adequately described (e.g., including explicit diagnostic criteria or "zero time" description).                                                                                                                                                                                 |
| <i>Adequate study participation</i>                                                         | There is adequate participation in the study by eligible individuals                                                                                                                                                                                                                                                 |
| <i>Baseline characteristics</i>                                                             | The baseline study sample (i.e., individuals entering the study) is adequately described for key characteristics.                                                                                                                                                                                                    |
| Study participation Summary                                                                 | The study sample represents the population of interest on key characteristics, sufficient to limit potential bias of the observed relationship between PF and outcome.                                                                                                                                               |
| <b>2. Study Attrition</b>                                                                   | <b>Goal: To judge the risk of attrition bias (likelihood that relationship between <i>PF</i> and <i>outcome</i> are different for completing and non-completing participants).</b>                                                                                                                                   |

|                                                                             |                                                                                                                                                                                                                                                                  |
|-----------------------------------------------------------------------------|------------------------------------------------------------------------------------------------------------------------------------------------------------------------------------------------------------------------------------------------------------------|
| <i>Proportion of baseline sample available for analysis</i>                 | Response rate (i.e., proportion of study sample completing the study and providing outcome data) is adequate.                                                                                                                                                    |
| <i>Attempts to collect information on participants who dropped out</i>      | Attempts to collect information on participants who dropped out of the study are described.                                                                                                                                                                      |
| <i>Reasons and potential impact of subjects lost to follow-up</i>           | Reasons for loss to follow-up are provided.                                                                                                                                                                                                                      |
| <i>Outcome and prognostic factor information on those lost to follow-up</i> | Participants lost to follow-up are adequately described for key characteristics.                                                                                                                                                                                 |
|                                                                             | There are no important differences between key characteristics and outcomes in participants who completed the study and those who did not.                                                                                                                       |
| Study Attrition Summary                                                     | Loss to follow-up (from baseline sample to study population analyzed) is not associated with key characteristics (i.e., the study data adequately represent the sample) sufficient to limit potential bias to the observed relationship between PF and outcome.  |
| <b>3. Prognostic Factor Measurement</b>                                     | <b>Goal: To judge the risk of measurement bias related to how PF was measured (differential measurement of PF related to the level of outcome).</b>                                                                                                              |
| <i>Definition of the PF</i>                                                 | A clear definition or description of 'PF' is provided (e.g., including dose, level, duration of exposure, and clear specification of the method of measurement).                                                                                                 |
| <i>Valid and Reliable Measurement of PF</i>                                 | Method of PF measurement is adequately valid and reliable to limit misclassification bias (e.g., may include relevant outside sources of information on measurement properties, also characteristics, such as blind measurement and limited reliance on recall). |
|                                                                             | Continuous variables are reported or appropriate cut-points (i.e., not data-dependent) are used.                                                                                                                                                                 |
| <i>Method and Setting of PF Measurement</i>                                 | The method and setting of measurement of PF is the same for all study participants.                                                                                                                                                                              |
| <i>Proportion of data on PF available for analysis</i>                      | Adequate proportion of the study sample has complete data for PF variable.                                                                                                                                                                                       |

|                                                      |                                                                                                                                                                                                                                                                                                          |
|------------------------------------------------------|----------------------------------------------------------------------------------------------------------------------------------------------------------------------------------------------------------------------------------------------------------------------------------------------------------|
| <i>Method used for missing data</i>                  | Appropriate methods of imputation are used for missing 'PF' data.                                                                                                                                                                                                                                        |
| PF Measurement Summary                               | PF is adequately measured in study participants to sufficiently limit potential bias.                                                                                                                                                                                                                    |
| <b>4. Outcome Measurement</b>                        | <b>Goal: To judge the risk of bias related to the measurement of outcome (differential measurement of outcome related to the baseline level of PF).</b>                                                                                                                                                  |
| <i>Definition of the Outcome</i>                     | A clear definition of outcome is provided, including duration of follow-up and level and extent of the outcome construct.                                                                                                                                                                                |
| <i>Valid and Reliable Measurement of Outcome</i>     | The method of outcome measurement used is adequately valid and reliable to limit misclassification bias (e.g., may include relevant outside sources of information on measurement properties, also characteristics, such as blind measurement and confirmation of outcome with valid and reliable test). |
| <i>Method and Setting of Outcome Measurement</i>     | The method and setting of outcome measurement is the same for all study participants.                                                                                                                                                                                                                    |
| Outcome Measurement Summary                          | <i>Outcome of interest</i> is adequately measured in study participants to sufficiently limit potential bias.                                                                                                                                                                                            |
| <b>5. Study Confounding</b>                          | <b>Goal: To judge the risk of bias due to confounding (i.e. the effect of PF is distorted by another factor that is related to PF and outcome).</b>                                                                                                                                                      |
| <i>Important Confounders Measured</i>                | All important confounders, including treatments (key variables in conceptual model), are measured.                                                                                                                                                                                                       |
| <i>Definition of the confounding factor</i>          | Clear definitions of the important confounders measured are provided (e.g., including dose, level, and duration of exposures).                                                                                                                                                                           |
| <i>Valid and Reliable Measurement of Confounders</i> | Measurement of all important confounders is adequately valid and reliable (e.g., may include relevant outside sources of information on measurement properties, also characteristics, such as blind measurement and limited reliance on recall).                                                         |
| <i>Method and Setting of Confounding Measurement</i> | The method and setting of confounding measurement are the same for all study participants.                                                                                                                                                                                                               |
| <i>Method used for missing data</i>                  | Appropriate methods are used if imputation is used for missing confounder data.                                                                                                                                                                                                                          |

|                                                                                                                                                                              |                                                                                                                                                                     |
|------------------------------------------------------------------------------------------------------------------------------------------------------------------------------|---------------------------------------------------------------------------------------------------------------------------------------------------------------------|
| <i>Appropriate Accounting for Confounding</i>                                                                                                                                | Important potential confounders are accounted for in the study design (e.g., matching for key variables, stratification, or initial assembly of comparable groups). |
|                                                                                                                                                                              | Important potential confounders are accounted for in the analysis (i.e., appropriate adjustment).                                                                   |
| Study Confounding Summary                                                                                                                                                    | Important potential confounders are appropriately accounted for, limiting potential bias with respect to the relationship between <i>PF</i> and <i>outcome</i> .    |
| <b>6. Statistical Analysis and Reporting</b>                                                                                                                                 | <b>Goal: To judge the risk of bias related to the statistical analysis and presentation of results.</b>                                                             |
| <i>Presentation of analytical strategy</i>                                                                                                                                   | There is sufficient presentation of data to assess the adequacy of the analysis.                                                                                    |
| <i>Model development strategy</i>                                                                                                                                            | The strategy for model building (i.e., inclusion of variables in the statistical model) is appropriate and is based on a conceptual framework or model.             |
|                                                                                                                                                                              | The selected statistical model is adequate for the design of the study.                                                                                             |
| <i>Reporting of results</i>                                                                                                                                                  | There is no selective reporting of results.                                                                                                                         |
| Statistical Analysis and Reporting Summary                                                                                                                                   | The statistical analysis is appropriate for the design of the study, limiting potential for presentation of invalid or spurious results.                            |
| Modified from: Hayden JA, Côté P, Bombardier C. Evaluation of the Quality of Prognosis Studies in Systematic Reviews. <i>Annals of Internal Medicine</i> . 2006;144:427-437. |                                                                                                                                                                     |

## Appendix 1. Example of planned PubMed search.

| Search | Query                                                                                                                                                                                                                                                                                                                                                                                                                                                                                                                                                                          |
|--------|--------------------------------------------------------------------------------------------------------------------------------------------------------------------------------------------------------------------------------------------------------------------------------------------------------------------------------------------------------------------------------------------------------------------------------------------------------------------------------------------------------------------------------------------------------------------------------|
| #1     | "Receptors, Urokinase Plasminogen Activator"[Mesh] OR "Soluble urokinase plasminogen activator receptor"[tiab] OR "Soluble urokinase plasminogen activator receptors"[tiab] OR "soluble urokinase-type plasminogen activator receptor"[tiab] OR "soluble urokinase-type plasminogen activator receptors"[tiab] OR "soluble urokinase receptor"[tiab] OR "soluble urokinase receptors"[tiab] OR "plasminogen activator receptor"[tiab] OR "plasminogen activator receptors"[tiab] OR suPAR[tiab] OR uPAR[tiab]                                                                  |
| #2     | "Mortality"[Mesh] OR mortality[tiab] OR mortalities[tiab] OR "death"[Mesh] OR death[tiab] OR deaths[tiab] OR fatality[tiab] OR fatalities[tiab] OR "fatal outcome"[tiab] OR "fatal outcomes"[tiab] OR "prognosis"[Mesh] OR prognosis[tiab] OR prognostic[tiab] OR "survival"[Mesh] OR "survival analysis"[Mesh] OR "survival rate"[Mesh] OR survival[tiab] OR "life expectancy"[Mesh] OR "life expectancy"[tiab] OR "hazard ratio"[tiab] OR "hazard ratios"[tiab] OR "risk assessment"[Mesh] OR risk[tiab] OR "severity of illness index"[Mesh] OR "severity of illness"[tiab] |
| #3     | #1 AND #2                                                                                                                                                                                                                                                                                                                                                                                                                                                                                                                                                                      |
| #4     | #3 NOT ("animals"[mh] NOT "humans"[mh])                                                                                                                                                                                                                                                                                                                                                                                                                                                                                                                                        |
| #5     | #4 NOT (case reports[ptyp] OR editorial[ptyp] OR comment[ptyp])                                                                                                                                                                                                                                                                                                                                                                                                                                                                                                                |

## Full PubMed search term:

((((("Receptors, Urokinase Plasminogen Activator"[Mesh] OR "Soluble urokinase plasminogen activator receptor"[tiab] OR "Soluble urokinase plasminogen activator receptors"[tiab] OR "soluble urokinase-type plasminogen activator receptor"[tiab] OR "soluble urokinase-type plasminogen activator receptors"[tiab] OR "soluble urokinase receptor"[tiab] OR "soluble urokinase receptors"[tiab] OR "plasminogen activator receptor"[tiab] OR "plasminogen activator receptors"[tiab] OR suPAR[tiab] OR uPAR[tiab])) AND ("Mortality"[Mesh] OR mortality[tiab] OR mortalities[tiab] OR "death"[Mesh] OR death[tiab] OR deaths[tiab] OR fatality[tiab] OR fatalities[tiab] OR "fatal outcome"[tiab] OR "fatal outcomes"[tiab] OR "prognosis"[Mesh] OR prognosis[tiab] OR prognostic[tiab] OR "survival"[Mesh] OR "survival analysis"[Mesh] OR "survival rate"[Mesh] OR survival[tiab] OR "life expectancy"[Mesh] OR "life expectancy"[tiab] OR "hazard ratio"[tiab] OR "hazard ratios"[tiab] OR "risk assessment"[Mesh] OR risk[tiab] OR "severity of illness index"[Mesh] OR "severity of illness"[tiab]))) NOT ("animals"[mh] NOT "humans"[mh])) NOT (case reports[ptyp] OR editorial[ptyp] OR comment[ptyp])



**PRISMA-P (Preferred Reporting Items for Systematic review and Meta-Analysis Protocols) 2015 checklist: recommended items to address in a systematic review protocol\***

| Section and topic                 | Item No | Checklist item                                                                                                                                                                                                                                                                    |
|-----------------------------------|---------|-----------------------------------------------------------------------------------------------------------------------------------------------------------------------------------------------------------------------------------------------------------------------------------|
| <b>ADMINISTRATIVE INFORMATION</b> |         |                                                                                                                                                                                                                                                                                   |
| Title:                            |         |                                                                                                                                                                                                                                                                                   |
| Identification                    | 1a      | Identify the report as a protocol of a systematic review. <b>Included in title, p. 1.</b>                                                                                                                                                                                         |
| Update                            | 1b      | If the protocol is for an update of a previous systematic review, identify as such. <b>N/A</b>                                                                                                                                                                                    |
| Registration                      | 2       | If registered, provide the name of the registry (such as PROSPERO) and registration number. <b>The protocol has been submitted at PROSPERO and is awaiting approval. The Registration statement and registration number will be added to the manuscript as soon as available.</b> |
| Authors:                          |         |                                                                                                                                                                                                                                                                                   |
| Contact                           | 3a      | Provide name, institutional affiliation, e-mail address of all protocol authors; provide physical mailing address of corresponding author. <b>p. 1-2.</b>                                                                                                                         |
| Contributions                     | 3b      | Describe contributions of protocol authors and identify the guarantor of the review. <b>p. 3.</b>                                                                                                                                                                                 |
| Amendments                        | 4       | If the protocol represents an amendment of a previously completed or published protocol, identify as such and list changes; otherwise, state plan for documenting important protocol amendments. <b>The plan for documenting protocol amendments is presented on p. 3.</b>        |
| Support:                          |         |                                                                                                                                                                                                                                                                                   |
| Sources                           | 5a      | Indicate sources of financial or other support for the review. <b>p. 3-4.</b>                                                                                                                                                                                                     |
| Sponsor                           | 5b      | Provide name for the review funder and/or sponsor. <b>p. 3-4.</b>                                                                                                                                                                                                                 |
| Role of sponsor or funder         | 5c      | Describe roles of funder(s), sponsor(s), and/or institution(s), if any, in developing the protocol. <b>p. 3-4.</b>                                                                                                                                                                |
| <b>INTRODUCTION</b>               |         |                                                                                                                                                                                                                                                                                   |
| Rationale                         | 6       | Describe the rationale for the review in the context of what is already known. <b>p. 8-10.</b>                                                                                                                                                                                    |
| Objectives                        | 7       | Provide an explicit statement of the question(s) the review will address with reference to participants, interventions, comparators, and outcomes (PICO). <b>p. 10-11.</b>                                                                                                        |
| <b>METHODS</b>                    |         |                                                                                                                                                                                                                                                                                   |
| Eligibility criteria              | 8       | Specify the study characteristics (such as PICO, study design, setting, time frame) and report characteristics (such as years considered, language, publication status) to be used as criteria for eligibility for the review. <b>p. 12-14.</b>                                   |
| Information sources               | 9       | Describe all intended information sources (such as electronic databases, contact with study authors, trial registers or other grey literature sources) with planned dates of coverage. <b>p. 14-15.</b>                                                                           |
| Search strategy                   | 10      | Present draft of search strategy to be used for at least one electronic database, including planned limits, such that it could be                                                                                                                                                 |

|                                    |     |                                                                                                                                                                                                                                                                             |
|------------------------------------|-----|-----------------------------------------------------------------------------------------------------------------------------------------------------------------------------------------------------------------------------------------------------------------------------|
|                                    |     | repeated. <a href="#">p. 15-16 + Appendix 1.</a>                                                                                                                                                                                                                            |
| Study records:                     |     |                                                                                                                                                                                                                                                                             |
| Data management                    | 11a | Describe the mechanism(s) that will be used to manage records and data throughout the review. <a href="#">p. 16.</a>                                                                                                                                                        |
| Selection process                  | 11b | State the process that will be used for selecting studies (such as two independent reviewers) through each phase of the review (that is, screening, eligibility and inclusion in meta-analysis). <a href="#">p. 16-17.</a>                                                  |
| Data collection process            | 11c | Describe planned method of extracting data from reports (such as piloting forms, done independently, in duplicate), any processes for obtaining and confirming data from investigators. <a href="#">p. 17-18.</a>                                                           |
| Data items                         | 12  | List and define all variables for which data will be sought (such as PICO items, funding sources), any pre-planned data assumptions and simplifications. <a href="#">p. 18-19.</a>                                                                                          |
| Outcomes and prioritization        | 13  | List and define all outcomes for which data will be sought, including prioritization of main and additional outcomes, with rationale. <a href="#">p. 19-21.</a>                                                                                                             |
| Risk of bias in individual studies | 14  | Describe anticipated methods for assessing risk of bias of individual studies, including whether this will be done at the outcome or study level, or both; state how this information will be used in data synthesis. <a href="#">p. 21-22.</a>                             |
| Data synthesis                     | 15a | Describe criteria under which study data will be quantitatively synthesised. <a href="#">p. 22-25</a>                                                                                                                                                                       |
|                                    | 15b | If data are appropriate for quantitative synthesis, describe planned summary measures, methods of handling data and methods of combining data from studies, including any planned exploration of consistency (such as $I^2$ , Kendall's $\tau$ ). <a href="#">p. 24-25.</a> |
|                                    | 15c | Describe any proposed additional analyses (such as sensitivity or subgroup analyses, meta-regression). <a href="#">p. 25-26.</a>                                                                                                                                            |
|                                    | 15d | If quantitative synthesis is not appropriate, describe the type of summary planned. <a href="#">p. 23.</a>                                                                                                                                                                  |
| Meta-bias(es)                      | 16  | Specify any planned assessment of meta-bias(es) (such as publication bias across studies, selective reporting within studies). <a href="#">p. 27.</a>                                                                                                                       |
| Confidence in cumulative evidence  | 17  | Describe how the strength of the body of evidence will be assessed (such as GRADE). <a href="#">p. 27-28.</a>                                                                                                                                                               |

**\* It is strongly recommended that this checklist be read in conjunction with the PRISMA-P Explanation and Elaboration (cite when available) for important clarification on the items. Amendments to a review protocol should be tracked and dated. The copyright for PRISMA-P (including checklist) is held by the PRISMA-P Group and is distributed under a Creative Commons Attribution Licence 4.0.**

*From: Shamseer L, Moher D, Clarke M, Ghersi D, Liberati A, Petticrew M, Shekelle P, Stewart L, PRISMA-P Group. Preferred reporting items for systematic review and meta-analysis protocols (PRISMA-P) 2015: elaboration and explanation. *BMJ*. 2015 Jan 2;349(jan02 1):g7647.*
